# Supplementary material for: Synthesis, glycosylation and NMR characterization of linear peracetylated d-galactose glycopolymers
Source: Royal Society of Chemistry journal article supplement (doi:10.1039/c5ra01265a), 2015-01-01
Supplement: c5ra01265a1.pdf [file c5ra01265a1.pdf]

## Electronic Supplementary Information

### Synthesis, glycosylation and NMR characterization of linear peracetylated D-galactose glycopolymers

Marco Pocci,\* Silvana Alfei, Francesco Lucchesini, Sara Castellaro, Vincenzo Bertini

*Dipartimento di Farmacia, Università di Genova  
Via Brigata Salerno, 13 I-16147 Genova, Italy*

#### List of contents

|                                                                                                                                                                                                                                                                                                                                                 |      |
|-------------------------------------------------------------------------------------------------------------------------------------------------------------------------------------------------------------------------------------------------------------------------------------------------------------------------------------------------|------|
| Table S1. Homopolymerization data of <b>4</b>                                                                                                                                                                                                                                                                                                   | p.2  |
| Table S2. Glycosylation data of model molecule <b>5</b> .                                                                                                                                                                                                                                                                                       | p.2  |
| Chart S1. Molecular formulas with numbering of the carbons of <b>4<math>\alpha\beta p</math></b> , <b>4<math>\alpha\beta f</math></b> ,<br><b>5<math>\alpha\beta p</math></b> , <b>5<math>\alpha\beta f</math></b> , <b>7<math>\beta f</math></b> , <b>9<math>\beta p</math></b> , and <b>10<math>\alpha\beta p</math></b> for NMR assignments. | p.3  |
| Characterization data of compounds <b>7<math>\alpha\beta f</math></b> , <b>8</b> , <b>9<math>\beta p</math></b> , and <b>10<math>\alpha\beta p</math></b> .                                                                                                                                                                                     | p.3  |
| Figure S1. <sup>1</sup> H NMR spectrum of <b>4<math>\alpha p</math></b> in CDCl <sub>3</sub> .                                                                                                                                                                                                                                                  | p.6  |
| Figure S2. <sup>13</sup> C NMR spectrum of <b>4<math>\alpha p</math></b> in CDCl <sub>3</sub> .                                                                                                                                                                                                                                                 | p.7  |
| Figure S3. <sup>1</sup> H NMR spectrum of <b>4<math>\beta p</math></b> as enriched monomer in CDCl <sub>3</sub> .                                                                                                                                                                                                                               | p.8  |
| Figure S4. <sup>13</sup> C NMR spectrum of <b>4<math>\beta p</math></b> as enriched monomer in CDCl <sub>3</sub> .                                                                                                                                                                                                                              | p.9  |
| Figure S5. <sup>1</sup> H NMR spectrum of <b>5<math>\alpha p</math></b> in CDCl <sub>3</sub> .                                                                                                                                                                                                                                                  | p.10 |
| Figure S6. <sup>13</sup> C NMR spectrum of <b>5<math>\alpha p</math></b> in CDCl <sub>3</sub> .                                                                                                                                                                                                                                                 | p.11 |
| Figure S7. <sup>1</sup> H NMR spectrum of <b>5<math>\beta p</math></b> in CDCl <sub>3</sub> .                                                                                                                                                                                                                                                   | p.12 |
| Figure S8. <sup>13</sup> C NMR spectrum of <b>5<math>\beta p</math></b> in CDCl <sub>3</sub> .                                                                                                                                                                                                                                                  | p.13 |
| Figure S9. <sup>1</sup> H NMR spectrum of <b>6<math>\alpha p</math></b> in CDCl <sub>3</sub> .                                                                                                                                                                                                                                                  | p.14 |
| Figure S10. <sup>13</sup> C NMR spectrum of <b>6<math>\alpha p</math></b> in CDCl <sub>3</sub> .                                                                                                                                                                                                                                                | p.15 |
| Figure S11. <sup>1</sup> H NMR spectrum of <b>6<math>\beta p</math></b> in CDCl <sub>3</sub> .                                                                                                                                                                                                                                                  | p.16 |
| Figure S12. <sup>13</sup> C NMR spectrum of <b>6<math>\beta p</math></b> in CDCl <sub>3</sub> .                                                                                                                                                                                                                                                 | p.17 |
| Figure S13. <sup>1</sup> H NMR spectrum of <b>7<math>\alpha\beta f</math></b> in CDCl <sub>3</sub> .                                                                                                                                                                                                                                            | p.18 |
| Figure S14. <sup>13</sup> C NMR spectrum of <b>7<math>\alpha\beta f</math></b> in CDCl <sub>3</sub> .                                                                                                                                                                                                                                           | p.19 |
| Figure S15. <sup>1</sup> H NMR and <sup>13</sup> C NMR spectra of <b>8</b> in CDCl <sub>3</sub> .                                                                                                                                                                                                                                               | p.20 |
| Figure S16. <sup>1</sup> H spectrum of <b>9<math>\beta p</math></b> in CDCl <sub>3</sub> .                                                                                                                                                                                                                                                      | p.21 |
| Figure S17. <sup>13</sup> C NMR spectrum of <b>9<math>\beta p</math></b> in CDCl <sub>3</sub> .                                                                                                                                                                                                                                                 | p.22 |
| Figure S18. <sup>1</sup> H NMR spectrum of <b>10<math>\alpha\beta p</math></b> in DMSO- <i>d</i> <sub>6</sub> .                                                                                                                                                                                                                                 | p.23 |
| Figure S19. <sup>13</sup> C NMR spectrum of <b>10<math>\alpha\beta p</math></b> in DMSO- <i>d</i> <sub>6</sub> .                                                                                                                                                                                                                                | p.24 |

Figure S20. <sup>1</sup>H NMR spectrum of **11** in CDCl<sub>3</sub>. p.25

Figure S21. <sup>13</sup>C NMR spectrum of **11** in CDCl<sub>3</sub>. p.26

Figure S22. <sup>1</sup>H and <sup>13</sup>C NMR spectra of **12** in CDCl<sub>3</sub>. p.27

**Table S1.** Homopolymerization of **4** in DMF at 60 °C.

| Run | Monomer<br>g (mmol)                                            | AIBN<br>mg (%) | DMF<br>mL | Time<br>h | Polymer<br>g (%)                                              |
|-----|----------------------------------------------------------------|----------------|-----------|-----------|---------------------------------------------------------------|
| 1   | <b>4<math>\alpha</math>p</b><br>0.188 (0.39)                   | 2.0 (1.1)      | 1.0       | 48        | <b>P4<math>\alpha</math>p</b><br>0.163 (87)                   |
| 2   | <b>4<math>\beta</math>p</b> <sup>a</sup><br>0.916 (1.92)       | 9.2 (1.0)      | 4.8       | 48        | <b>P4<math>\beta</math>p</b> <sup>a</sup><br>0.839 (92)       |
| 3   | <b>4<math>\alpha</math><math>\beta</math>p</b><br>1.860 (3.90) | 18.6 (1.0)     | 18.0      | 24        | <b>P4<math>\alpha</math><math>\beta</math>p</b><br>0.821 (44) |
| 4   | <b>4<math>\alpha</math><math>\beta</math>p</b><br>2.18 (4.57)  | 21.8 (1.0)     | 11.6      | 50        | <b>P4<math>\alpha</math><math>\beta</math>p</b><br>1.99 (91)  |
| 5   | <b>4<math>\alpha</math><math>\beta</math>pf</b><br>2.28 (4.76) | 22.9 (1.0)     | 16        | 72        | <b>P4<math>\alpha</math><math>\beta</math>pf</b><br>2.01 (88) |

AIBN = azobisisobutyronitrile; DMF = *N,N*-dimethylformamide; *p* = pyranose form; *f* = furanose form; <sup>a</sup> as enriched  $\beta$ -pyranose anomer.

**Table S2.** Typical glycosylation data of **5** with **2** in the presence of SnCl<sub>4</sub> or BF<sub>3</sub>·Et<sub>2</sub>O in CH<sub>2</sub>Cl<sub>2</sub>.

| Run | Substrate<br>mg<br>(mmol)                                                       | C<br>$\mu$ L<br>(mmol)                               | <b>2</b><br>mg<br>(mmol) | <b>5</b> : C : <b>2</b><br>Molar<br>ratio | <b>6<math>\alpha</math>p</b><br>mg<br>(mmol)<br>% | <b>6<math>\beta</math>p</b><br>mg<br>(mmol)<br>% | <b>7<math>\alpha</math><math>\beta</math>f</b><br>mg<br>(mmol)<br>% | <b>8</b><br>mg<br>(mmol)<br>% <sup>a</sup> | <b>9<math>\beta</math>p</b><br>mg<br>(mmol)<br>% | <b>10<math>\alpha</math><math>\beta</math>p</b><br>mg<br>(mmol)<br>% |
|-----|---------------------------------------------------------------------------------|------------------------------------------------------|--------------------------|-------------------------------------------|---------------------------------------------------|--------------------------------------------------|---------------------------------------------------------------------|--------------------------------------------|--------------------------------------------------|----------------------------------------------------------------------|
| 1   | <b>5<math>\alpha</math>p</b><br>108.2<br>(0.240)                                | SnCl <sub>4</sub><br>35<br>(0.299)                   | 78.3<br>(0.269)          | 1:1.3:1.1                                 | 41.8<br>(0.061)<br>25.4                           | 5.2<br>(0.008)<br>3.3                            | -                                                                   | 27.2<br>(0.082)<br>30.5                    | -                                                | -                                                                    |
| 2   | <b>5<math>\beta</math>p</b><br>250.9<br>(0.556)                                 | SnCl <sub>4</sub><br>70<br>(0.598)                   | 173.1<br>(0.594)         | 1:1.1:1.1                                 | -                                                 | 111.0<br>(0.163)<br>29.3                         | -                                                                   | 85.5<br>(0.257)<br>43.2                    | 22.3<br>(0.054)<br>9.1                           | -                                                                    |
| 3   | <b>5<math>\alpha</math><math>\beta</math>f</b> <sup>b</sup><br>116.2<br>(0.257) | SnCl <sub>4</sub><br>35<br>(0.299)                   | 84.0<br>(0.299)          | 1:1.2:1.2                                 | -                                                 | -                                                | 84.4<br>(0.124)<br>48.1                                             | 7.1<br>(0.021)<br>7.3                      | -                                                | -                                                                    |
| 4   | <b>5<math>\beta</math>p</b><br>200.3<br>(0.444)                                 | BF <sub>3</sub> ·Et <sub>2</sub> O<br>60<br>(0.473)  | 142.6<br>(0.490)         | 1:1.1:1.1                                 | -                                                 | 100.9<br>(0.148)<br>33.3                         | -                                                                   | 71.7<br>(0.215)<br>43.9                    | 2.5<br>(0.006)<br>1.4                            | -                                                                    |
| 5   | <b>5<math>\alpha</math><math>\beta</math>p</b> <sup>d</sup><br>122.9<br>(0.272) | BF <sub>3</sub> ·Et <sub>2</sub> O<br>252<br>(2.042) | 95.1<br>(0.327)          | 1:7.5:1.2                                 | -                                                 | 36.9<br>(0.054)<br>19.9                          | -                                                                   | 22.9<br>(0.069)<br>21.0                    | 7.4<br>(0.018)<br>6.6                            | 15.5<br>(0.038)<br>13.9                                              |

C = promoter; <sup>a</sup> yield percent with respect to **2**; <sup>b</sup>  $\beta/\alpha = 1.3$ ; <sup>c</sup>  $\beta/\alpha = 2.0$ ; <sup>d</sup>  $\beta/\alpha = 2.2$ .

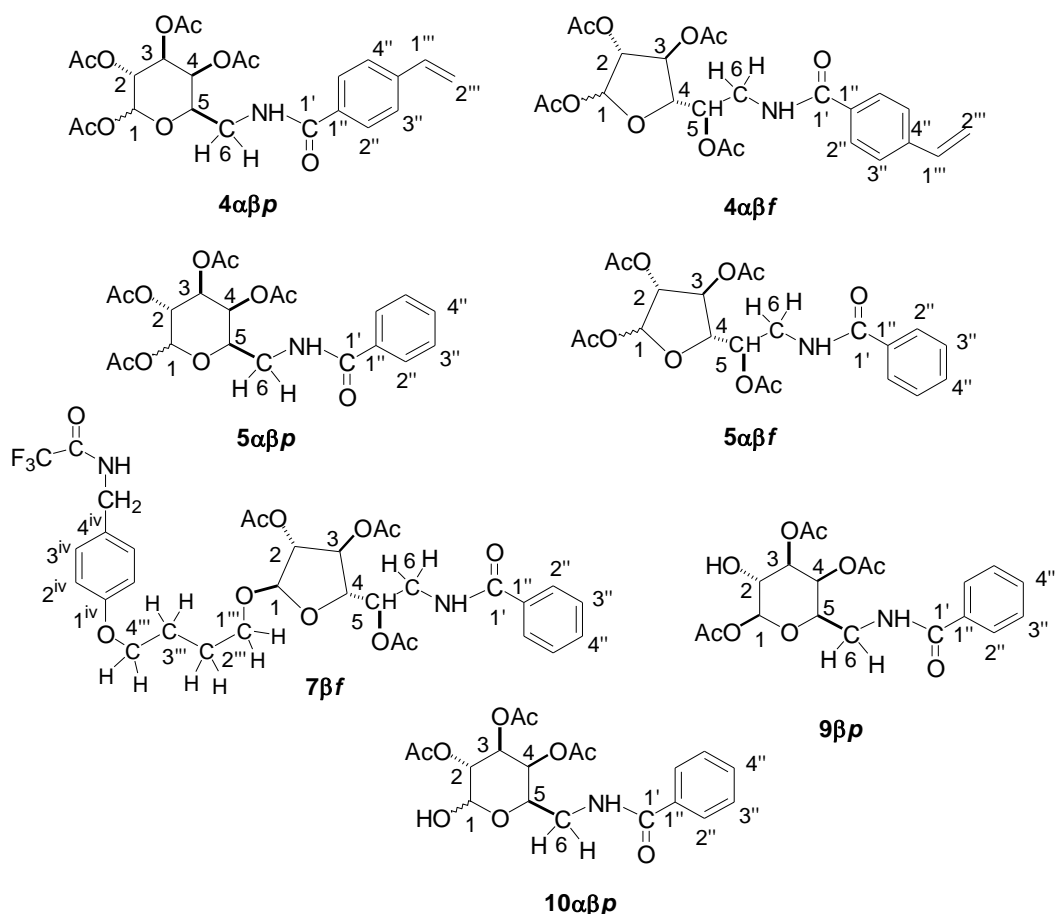

**Chart S1.** Numbering of the carbons of **4αβp**, **4αβf**, **5αβp**, **5αβf**, **7βf**, **9βp**, and **10αβp** for NMR assignments.

### Characterization of compounds **7αβf**, **8**, **9βp**, and **10αβp**

**7αβf.** Oil.  $\nu_{\max}/\text{cm}^{-1}$  (neat) 1748 (ester), 1650 (amide).

**7βf.**  $\delta_H$  (300 MHz; CDCl<sub>3</sub>, Me<sub>4</sub>Si) 1.72-1.89 (m, 4H, H-2''' + H-3'''), 2.07 (s, 3H, CH<sub>3</sub>)\*, 2.10 (s, 3H, CH<sub>3</sub>), 2.13 (s, 3H, CH<sub>3</sub>), 3.49-3.91 (m, 4H, H-6 + H-1'''), 3.97 (t, 2H,  $J = 6.1$ , H-4'''), 4.25 (dd, 1H,  $J_1 = 5.7$ ,  $J_2 = 3.2$ , H-4), 4.43 (d, 2H,  $J = 5.6$ , H-1<sup>v</sup>)\*, 4.98-5.03 (m, 1H, H-3), 5.04-5.09 (m, 2H, H-1 + H-2), 5.33 (dt, 1H,  $J_1 = 7.1$ ,  $J_2 = 3.4$ , H-5), 6.81-6.91 (m, 3H, H-2<sup>iv</sup> + H-6<sup>iv</sup> + CH<sub>2</sub>NH)\*, 7.14-7.22 (m, 2H, H-3<sup>iv</sup> + H-5<sup>iv</sup>), 7.25 (bs, 1H, CF<sub>3</sub>CONH)\*, 7.38-7.53 (m, 3H, H-3'' + H-4'' + H-5'')\*, 7.70-7.76 (m, 2H, H-2'' + H-6'')\*. \*Overlapped with those from **7αf**.  $\delta_C$  (75.5 MHz, CDCl<sub>3</sub>, Me<sub>4</sub>Si) 20.68 (CH<sub>3</sub>)\*\*, 20.78 (CH<sub>3</sub>)\*\*, 20.91 (CH<sub>3</sub>)\*\*, 25.88 (C-2''' or C-3''')\*\*, 25.94 (C-2''' or C-3''')\*\*, 41.75 (C-6), 43.37 (C-1<sup>v</sup>)\*\*, 67.34 (C-1''), 67.54 (C-4'')\*\*, 70.62 (C-5), 76.89 (C-3), 81.33 (C-2), 81.61 (C-4), 105.59 (C-1), 114.87 (C-2<sup>iv</sup>)\*\*, 115.96 (q, CF<sub>3</sub>CO,  $J_{\text{CF}} = 288$ )\*\*, 126.89

(C-2'')\*\*, 128.13 (C-4<sup>iv</sup>), 128.63 (C-3'')\*\*, 129.45 (C-3<sup>iv</sup>)\*\*, 131.65 (C-4'')\*\*, 134.07 (C-1''), 157.10 (q, CF<sub>3</sub>CO,  $J_{CF} = 37$ )\*\*, 158.86 (C-1<sup>iv</sup>)\*\*, 167.54 (CO, amide), 169.80 (CO, ester)\*\*,  
170.31 (CO, ester), 171.18 (CO, ester). \*\*Overlapped with those of **7 $\alpha$ f** or not assignable to the proper anomer.

**7 $\alpha$ f**.  $\delta_H$  (300 MHz; CDCl<sub>3</sub>, Me<sub>4</sub>Si) 1.72-1.89 (m, 4H, H-2''' + H-3'''), 2.07 (s, 3H, CH<sub>3</sub>)\*, 2.09 (s, 3H, CH<sub>3</sub>), 2.11 (s, 3H, CH<sub>3</sub>), 3.35-3.45 (m, 1H, H-6), 3.49-3.91 (m, 3H, H-6 + H-1'''), 3.97 (t, 2H,  $J = 6.1$ , H-4'''), 4.08 (dd, 1H,  $J_1 = 6.5$ ,  $J_2 = 5.2$ , H-4), 4.43 (d, 2H,  $J = 5.6$ , H-1<sup>v</sup>)\*, 5.14-5.17 (m, 1H, H-5), 5.21 (d, 1H,  $J = 4.7$ , H-1), 5.56 (dd, 1H,  $J_1 = 7.2$ ,  $J_2 = 6.5$ , H-3), 6.81-6.91 (m, 3H, H-2<sup>iv</sup> + H-6<sup>iv</sup> + CH<sub>2</sub>NH)\*, 7.14-7.22 (m, 2H, H-3<sup>iv</sup> + H-5<sup>iv</sup>)\*, 7.25 (bs, 1H, CF<sub>3</sub>CONH)\*, 7.38-7.53 (m, 3H, H-3'' + H-4'' + H-5'')\*, 7.70-7.76 (m, 2H, H-2'' + H-6'')\*. \*Overlapped with those from **7 $\beta$ f**.

The H-2 signal around 5.0 ppm is hidden under H-3 from the  $\beta$ -anomer (DQF-COSY).  $\delta_C$  (75.5 MHz, CDCl<sub>3</sub>, Me<sub>4</sub>Si) 20.54 (CH<sub>3</sub>), 20.67 (CH<sub>3</sub>)\*\*, 20.78 (CH<sub>3</sub>)\*\*, 20.91 (CH<sub>3</sub>)\*\*, 25.88 (C-2''' or C-3''')\*\*, 25.94 (C-2''' or C-3''')\*\*, 41.08 (C-6), 43.37 (C-1<sup>v</sup>)\*\*, 67.54 (C-4'')\*\*, 68.18 (C-1''), 71.80, 73.91, 76.46, 78.91, 99.68 (C-1), 114.87 (C-2<sup>iv</sup>)\*\*, 115.96 (q, CF<sub>3</sub>CO,  $J_{CF} = 288$ )\*\*, 126.89 (C-2'')\*\*, 128.06 (C-4<sup>iv</sup>), 128.63 (C-3'')\*\*, 129.45 (C-3<sup>iv</sup>)\*\*, 131.65 (C-4'')\*\*, 134.07 (C-1'')\*\*, 157.10 (q, CF<sub>3</sub>CO,  $J_{CF} = 37$ ), 158.86 (C-1<sup>iv</sup>)\*\*, 167.49 (CO, amide), 169.80 (CO, ester)\*\*,  
170.37 (CO, ester), 171.27 (CO, ester). \*\*Overlapped with those of **7 $\beta$ f** or not assignable to the proper anomer.

**8**. Mp 65-66 °C (from Et<sub>2</sub>O/pentane/-30 °C).  $\nu_{max}/cm^{-1}$  (KBr) 3334 (NH amide), 1716 (ester + amide).  $\delta_H$  (300 MHz; CDCl<sub>3</sub>, Me<sub>4</sub>Si) 1.73-1.89 (m, 4H), 2.05 (s, 3H, CH<sub>3</sub>), 3.98 (t, 2H,  $J = 5.9$ ), 4.13 (t, 3H,  $J = 6.2$ ), 4.45 (d, 2H,  $J = 5.7$ ), 6.64 (bs, 1H, NH), 6.84-6.91 (m, 2H), 7.17-7.23 (m, 2H).  $\delta_C$  (75.5 MHz, CDCl<sub>3</sub>, Me<sub>4</sub>Si) 20.95, 25.40, 25.84, 43.47, 64.11, 67.42, 114.96, 115.93 (q,  $^1J_{CF} = 288$ ), 128.04, 129.48, 157.06 (q,  $^2J_{CF} = 37$ ), 158.97, 171.25.  $m/z$  (CI) 334 (M<sup>+</sup>+1, 20%), 221 (100).  
Anal. calcd for C<sub>15</sub>H<sub>18</sub>F<sub>3</sub>NO<sub>4</sub>: C, 54.05; H, 5.44; N, 4.20. Found: C, 54.26; H, 5.77; N, 4.06.

**9βp.**  $[\alpha]_D^{22} = +17.2$  (*c* 0.255, CHCl<sub>3</sub>).  $\nu_{\max}/\text{cm}^{-1}$  (KBr) 3375 (NH + OH), 1751 (ester), 1646 (amide).  $\delta_H$  (300 MHz; CDCl<sub>3</sub>, Me<sub>4</sub>Si) 2.07 (s, 3H, CH<sub>3</sub>), 2.19 (s, 3H, CH<sub>3</sub>), 2.20 (s, 3H, CH<sub>3</sub>), 2.65 (bs, 1H, OH), 3.47-3.70 (m, 2H, H-6), 3.92-4.06 (m, 2H, H-2 + H-5), 5.02 (dd, 1H,  $J_1 = 3.4$ ,  $J_2 = 10.2$ , H-3), 5.41 (dd, 1H,  $J_1 = 0.7$ ,  $J_2 = 3.4$ , H-4), 5.63 (d, 1H,  $J = 8.2$ , H-1), 6.63 (bt, 1H,  $J = 5.6$ , NH), 7.38-7.55 (m, 3H, aromatics), 7.72-7.79 (m, 2H, aromatics).  $\delta_C$  (75.5 MHz, CDCl<sub>3</sub>, Me<sub>4</sub>Si) 20.72 (CH<sub>3</sub>), 20.98 (3CH<sub>3</sub>), 39.20 (C-6), 68.35, 68.52, 72.46, 73.03, 94.44 (C-1), 127.03 (C-2''), 128.66 (C-3''), 131.74 (C-4''), 133.92 (C-1''), 167.60 (CO, amide), 169.28 (CO, ester), 170.45 (CO, ester), 170.83 (CO, ester). Anal. calcd for C<sub>19</sub>H<sub>23</sub>NO<sub>9</sub>: C, 55.74; H, 5.66; N, 3.42. Found: C, 55.64; H, 5.56; N, 3.13.

**10αβp.**  $\nu_{\max}/\text{cm}^{-1}$  (KBr): 3390 (NH + OH), 1740 (ester), 1647 (amide).  $\delta_H$  (300 MHz; DMSO-*d*<sub>6</sub>, Me<sub>4</sub>Si) 1.88 (s, CH<sub>3</sub>β), 1.91 (s, 3H, CH<sub>3</sub>α), 2.01 (s, 3H, CH<sub>3</sub>β), 2.03 (s, 3H, CH<sub>3</sub>α), 2.12 (s, 3H, CH<sub>3</sub>α), 2.13 (s, 3H, CH<sub>3</sub>β), 3.10-3.29 (m, H-6α + H-6β), 3.44-3.64 (m, H-6α + H-6β), 4.12 (bt, 1H,  $J = 7.0$ , H-5β), 4.44 (bt, 1H,  $J = 7.1$ , H-5α), 4.78 (dd, 1H,  $J_1 = 7.8$ ,  $J_2 = 6.5$ , H-1β), 4.86-4.97 (m, H-2α + H-2β), 5.09 (dd, 1H,  $J_1 = 10.3$ ,  $J_2 = 3$ , H-3β), 5.18-5.30 (m, H-1α + H-3α + H-4α + H-4β), 7.11 (dd, 1H,  $J_1 = 4.8$ ,  $J_2 = 0.9$ , OHα), 7.19 (d, 1H,  $J = 6.5$ , OHβ), 7.43-7.56 (m, aromatics), 7.52-7.56 (m, aromatics), 8.45 (bdd, 1H,  $J_1 = 7.1$ ,  $J_2 = 4.1$ , NHα), 8.56 (bdd, 1H,  $J_1 = 6.6$ ,  $J_2 = 4.8$ , NHβ).  $\delta_C$  (75.5 MHz; DMSO-*d*<sub>6</sub>, Me<sub>4</sub>Si) 20.31 (CH<sub>3</sub>β), 20.36 (CH<sub>3</sub>α), 20.47 (CH<sub>3</sub>α), 20.52 (CH<sub>3</sub>α), 20.55 (CH<sub>3</sub>β), 20.58 (CH<sub>3</sub>β), 38.46 (C-6), 38.56 (C-6), 65.57 (α-anomer), 67.15 (α-anomer), 67.40 (β-anomer), 67.68 (α-anomer), 68.26 (α-anomer), 70.12 (β-anomer), 70.17 (β-anomer), 89.36 (C-1α), 94.21 (C-1β), 127.05 (C-2''), 128.18 (C-3''), 131.14 (C-4''α), 131.18 (C-4''β), 134.12 (C-1''β), 134.21 (C-1''α), 166.38 (CO, amide), 169.12 (CO, ester), 169.53 (CO, ester), 169.54 (CO, ester), 169.95 (CO ester).

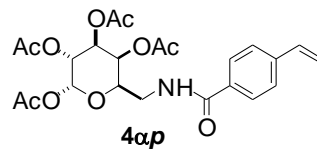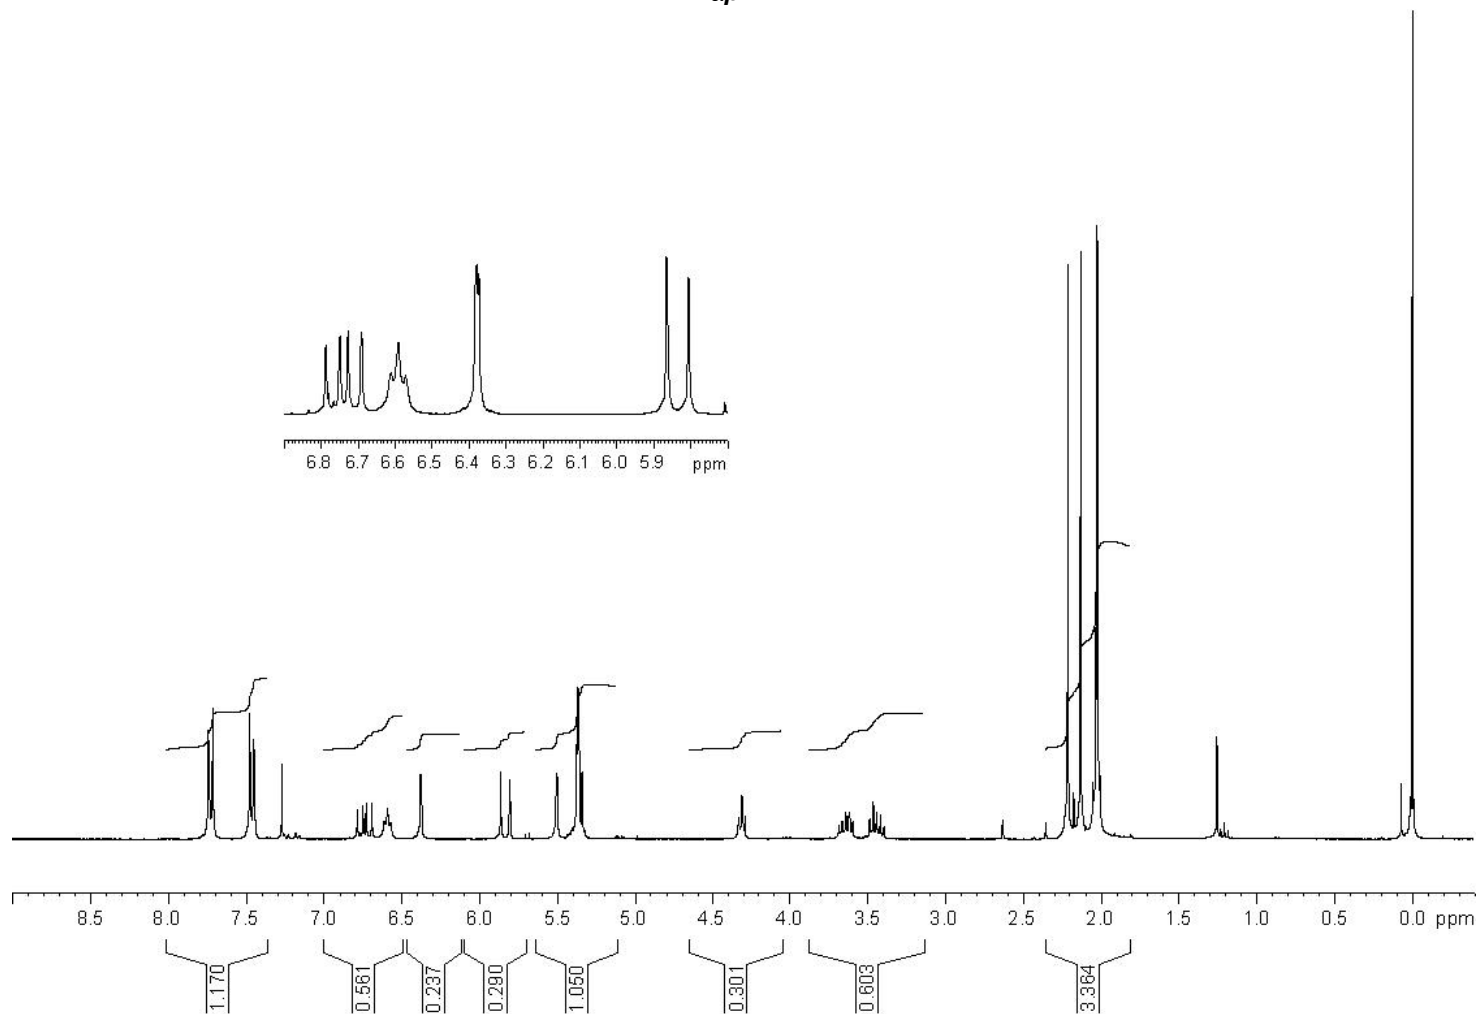

**Figure S1.**  $^1\text{H}$  NMR spectrum of **4ap** in  $\text{CDCl}_3$ .

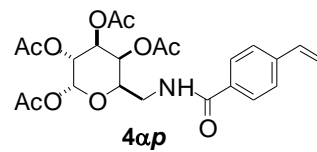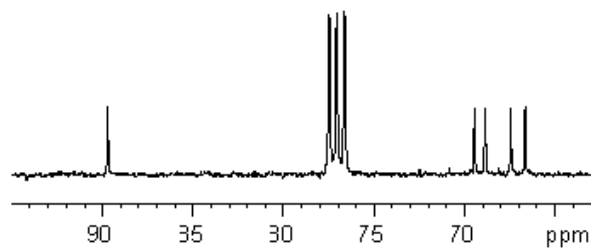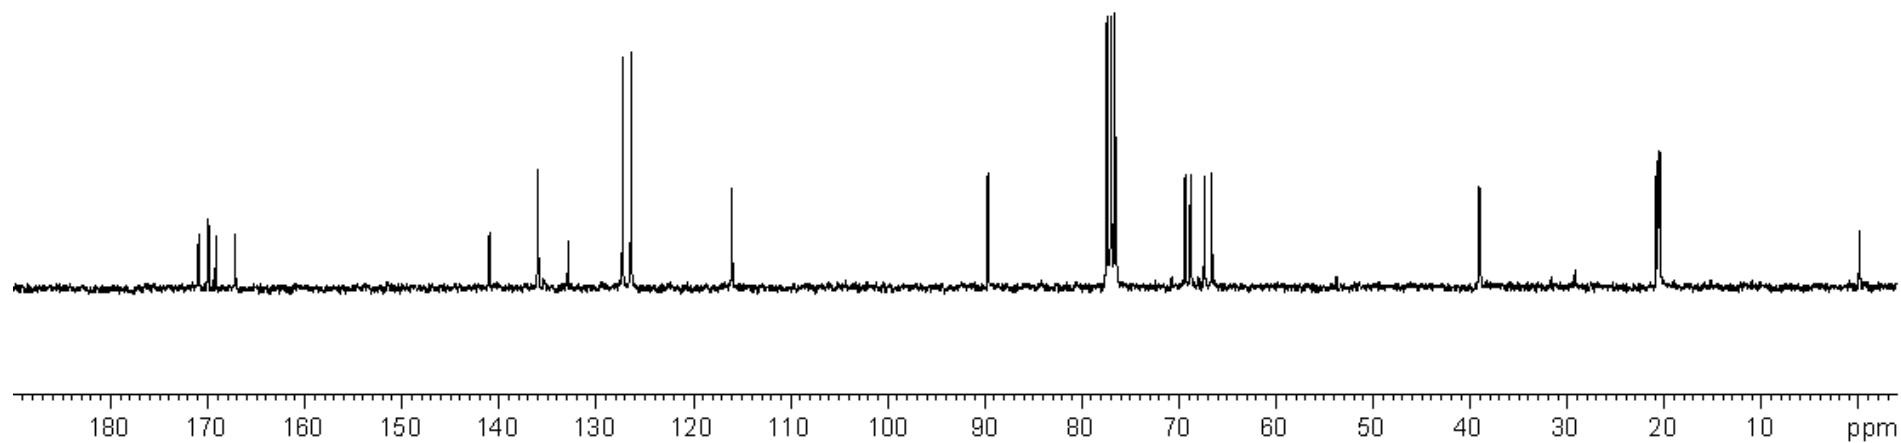

**Figure S2.**  $^{13}\text{C}$  NMR spectrum of **4αp** in  $\text{CDCl}_3$ .

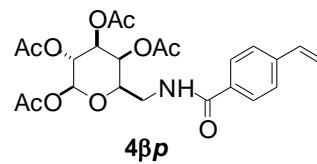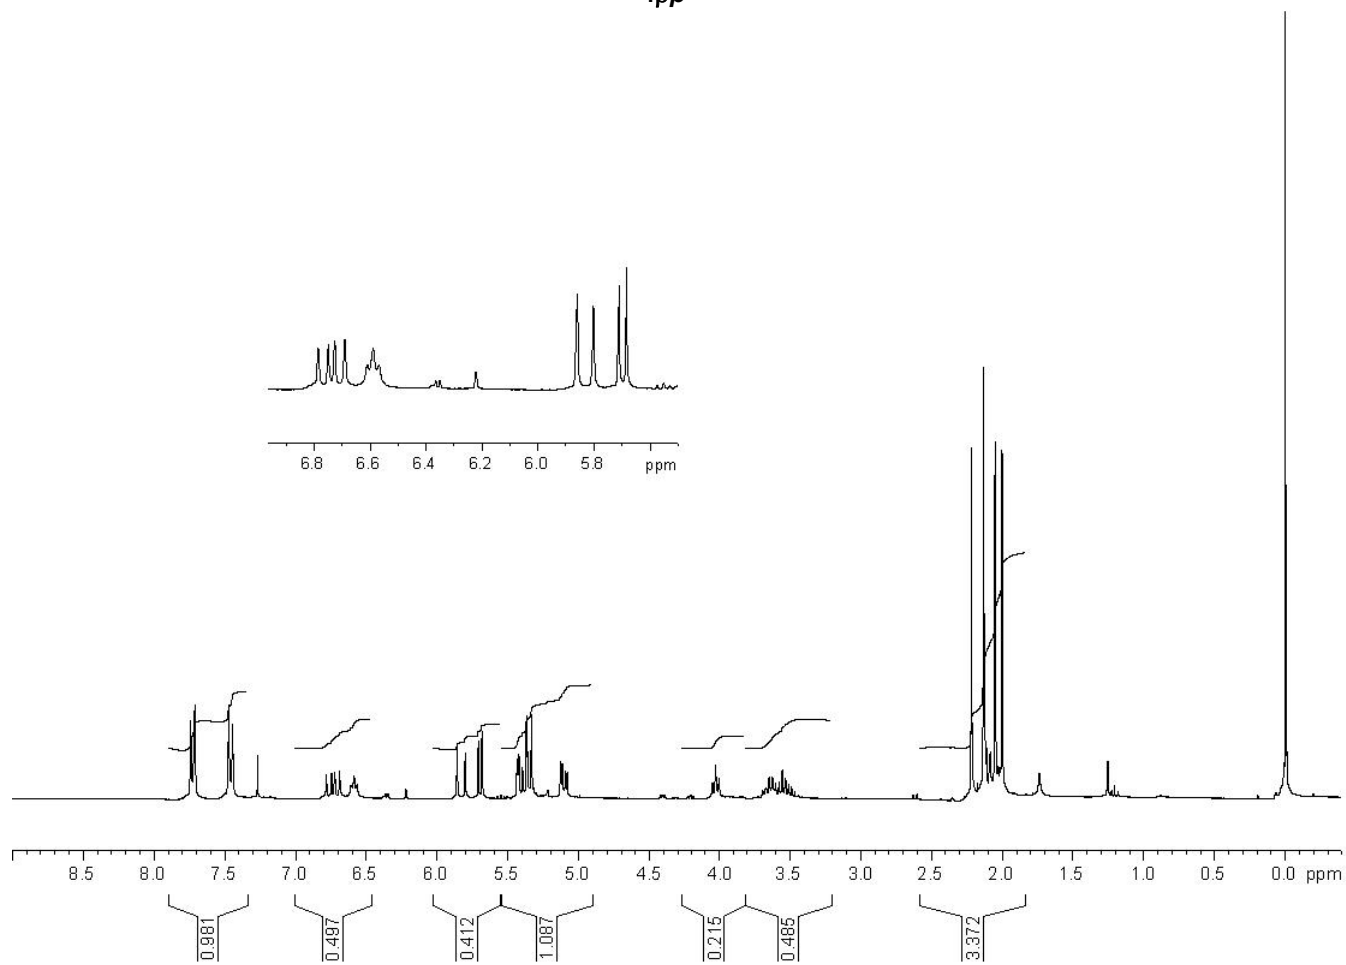

**Figure S3.** <sup>1</sup>H NMR spectrum of **4βp** containing small amounts of **4αp**, **4αf** and **4βf** in CDCl<sub>3</sub>.



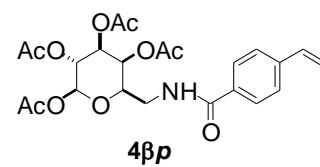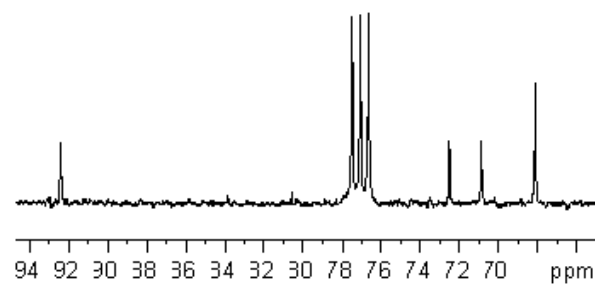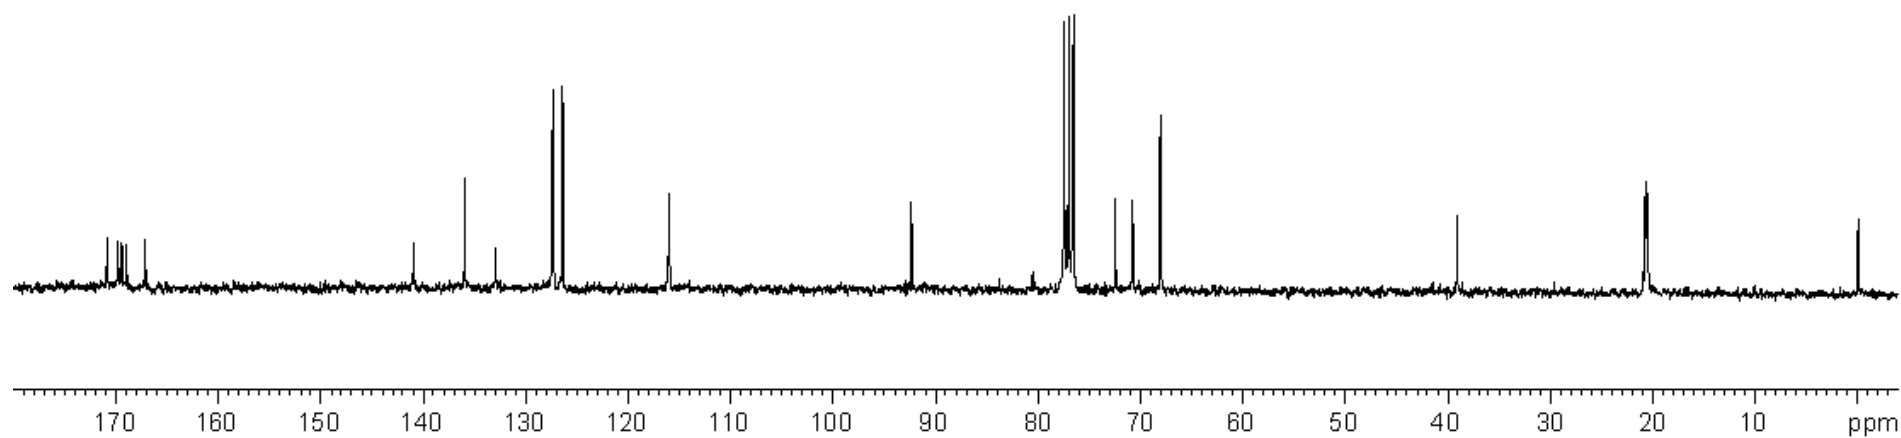

**Figure S4.**  $^{13}\text{C}$  NMR spectrum of **4βp** containing small amounts of **4αp**, **4αf** and **4βf** in  $\text{CDCl}_3$ .

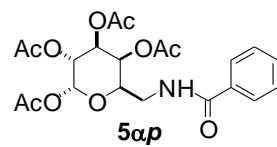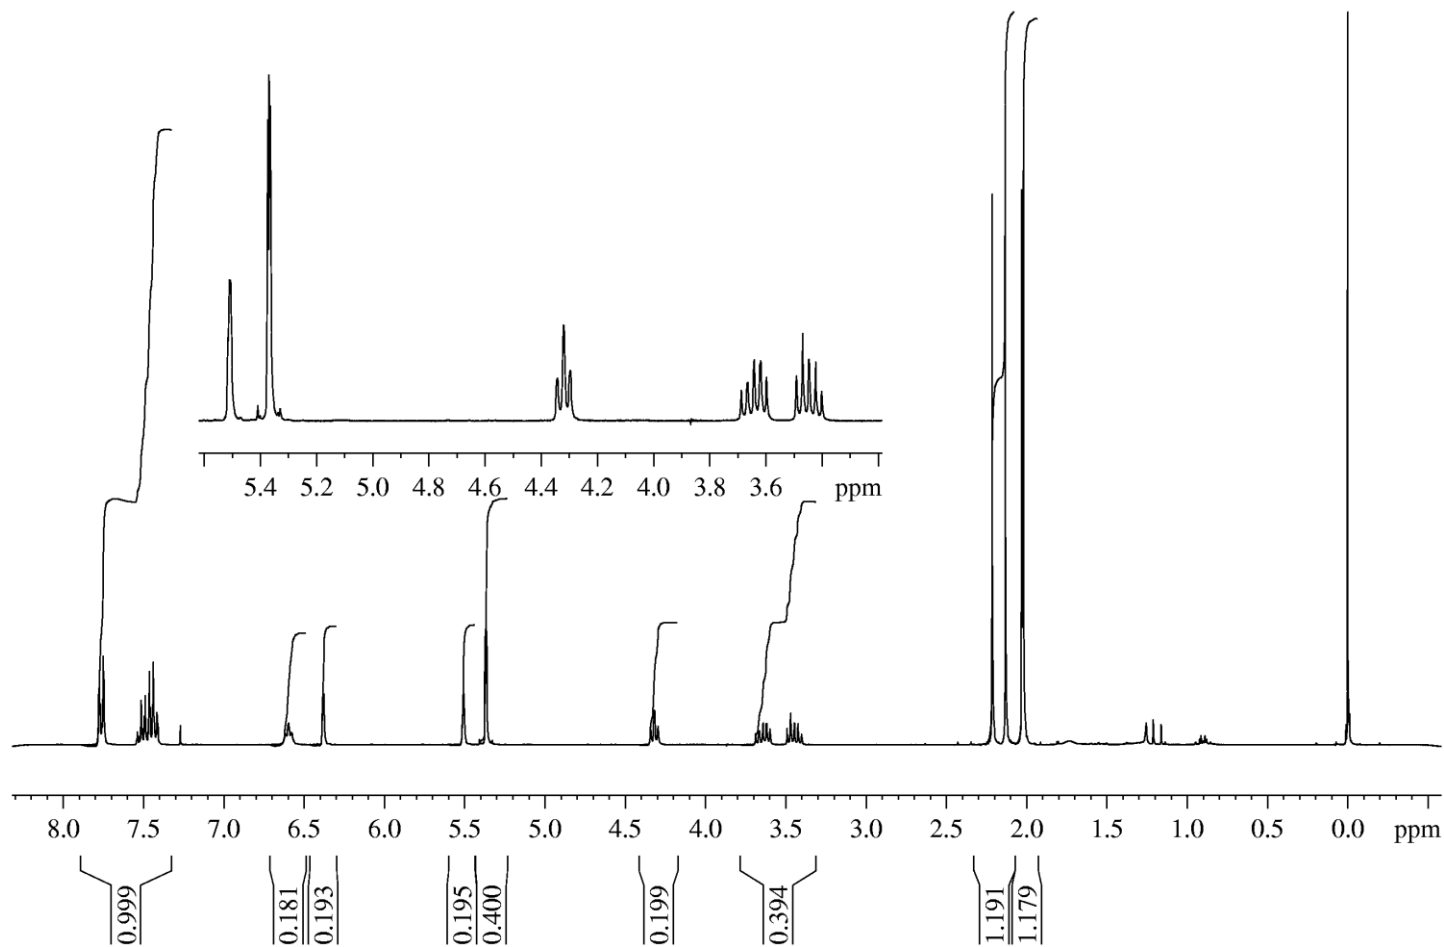

**Figure S5.**  $^1\text{H}$  NMR spectrum of **5 $\alpha$ p** in  $\text{CDCl}_3$ .

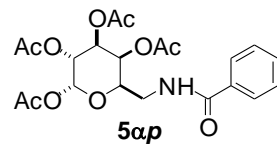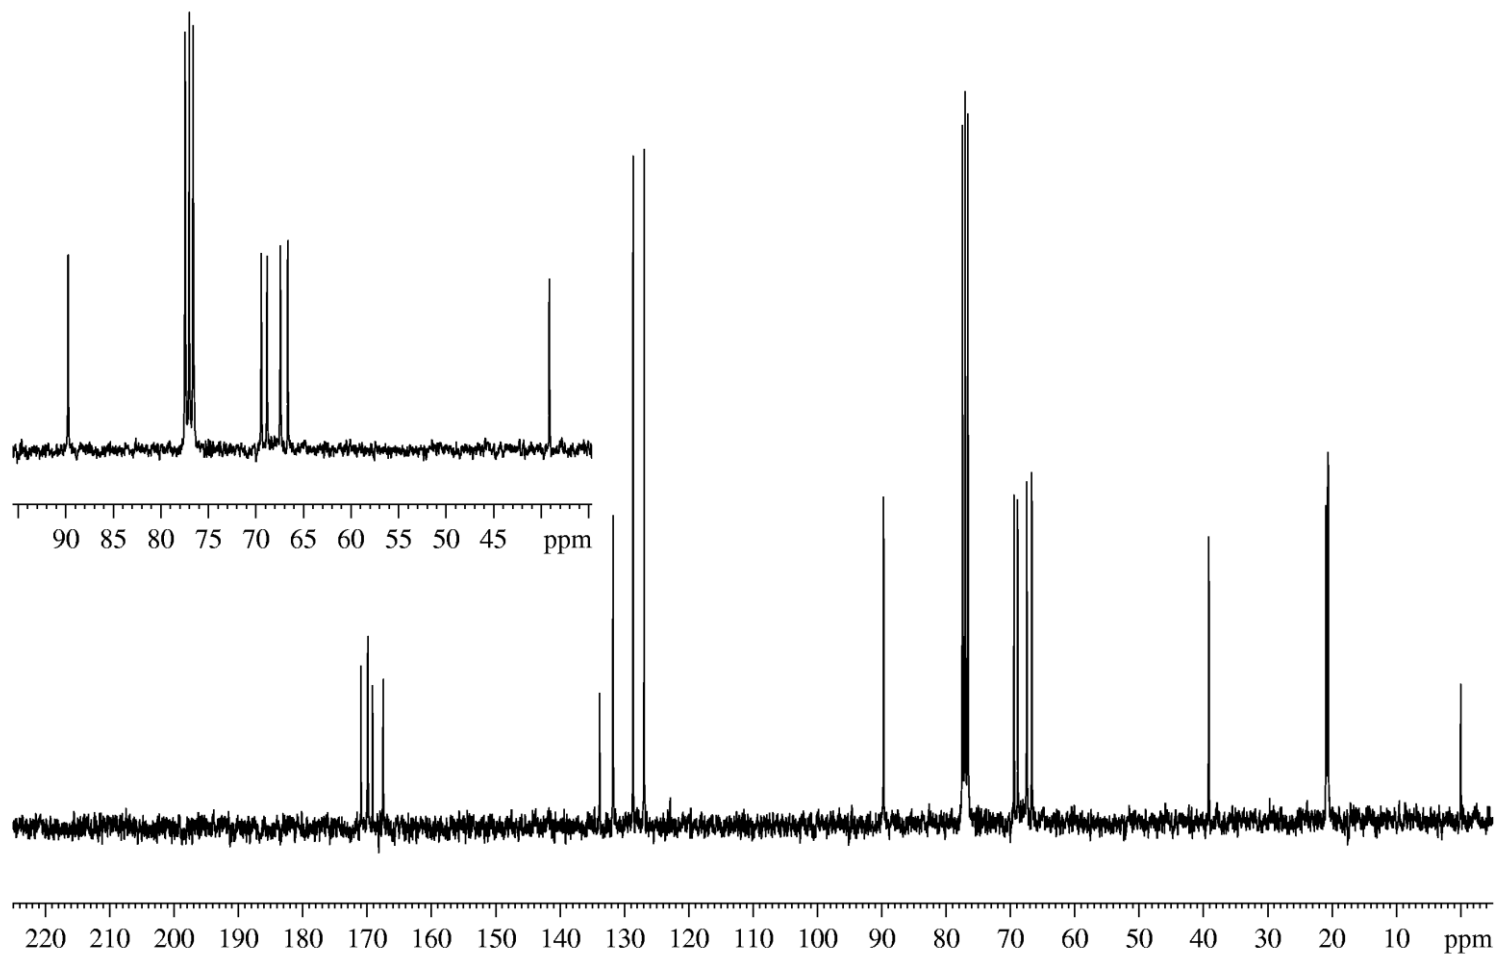

**Figure S6.**  $^{13}\text{C}$  NMR spectrum of **5ap** in  $\text{CDCl}_3$ .

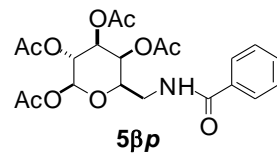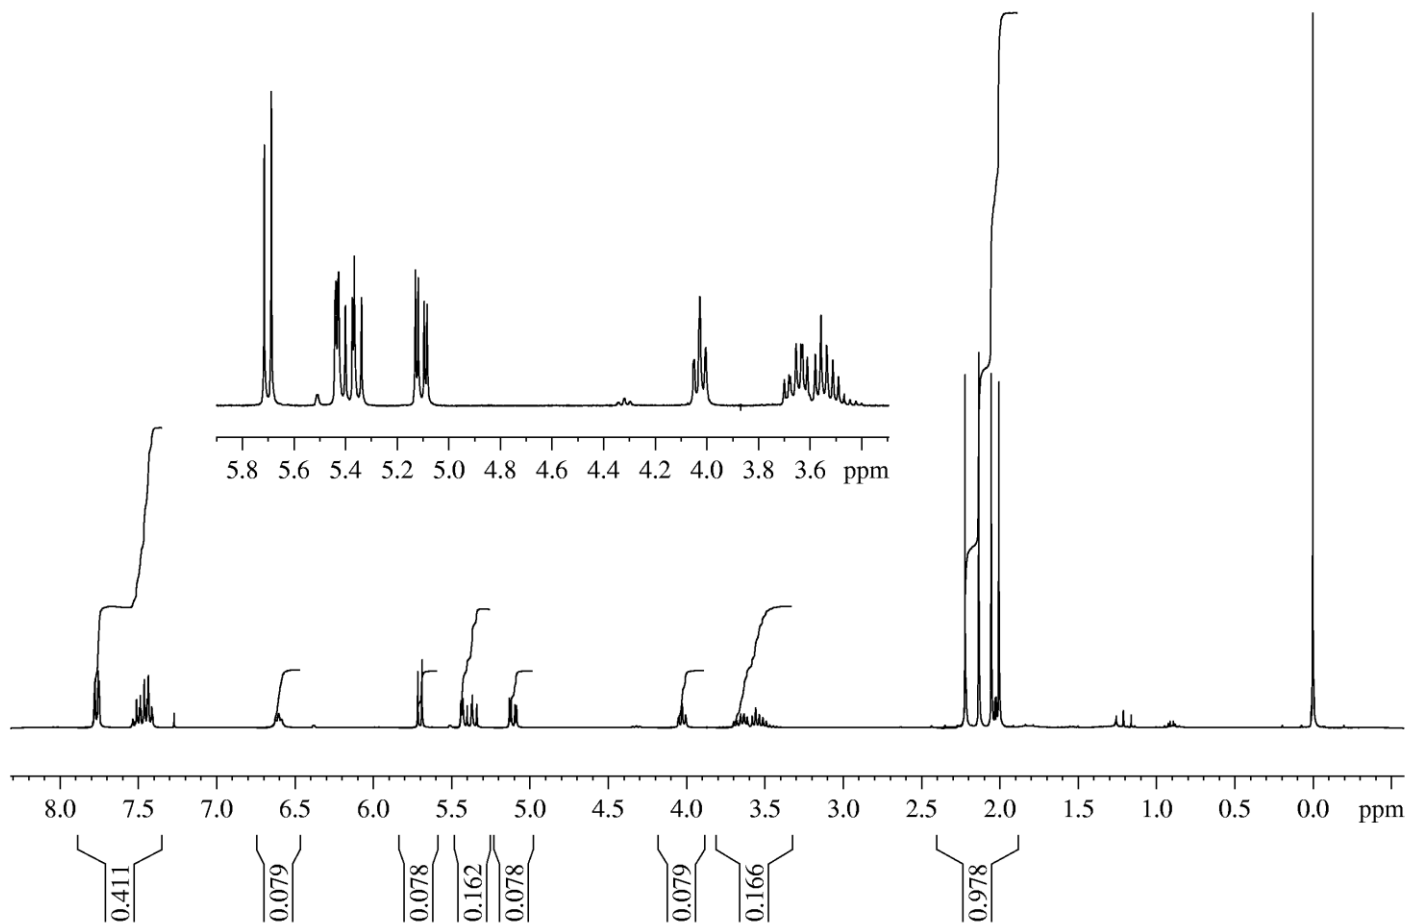

**Figure S7.** <sup>1</sup>H NMR spectrum of **5βp** in CDCl<sub>3</sub>.

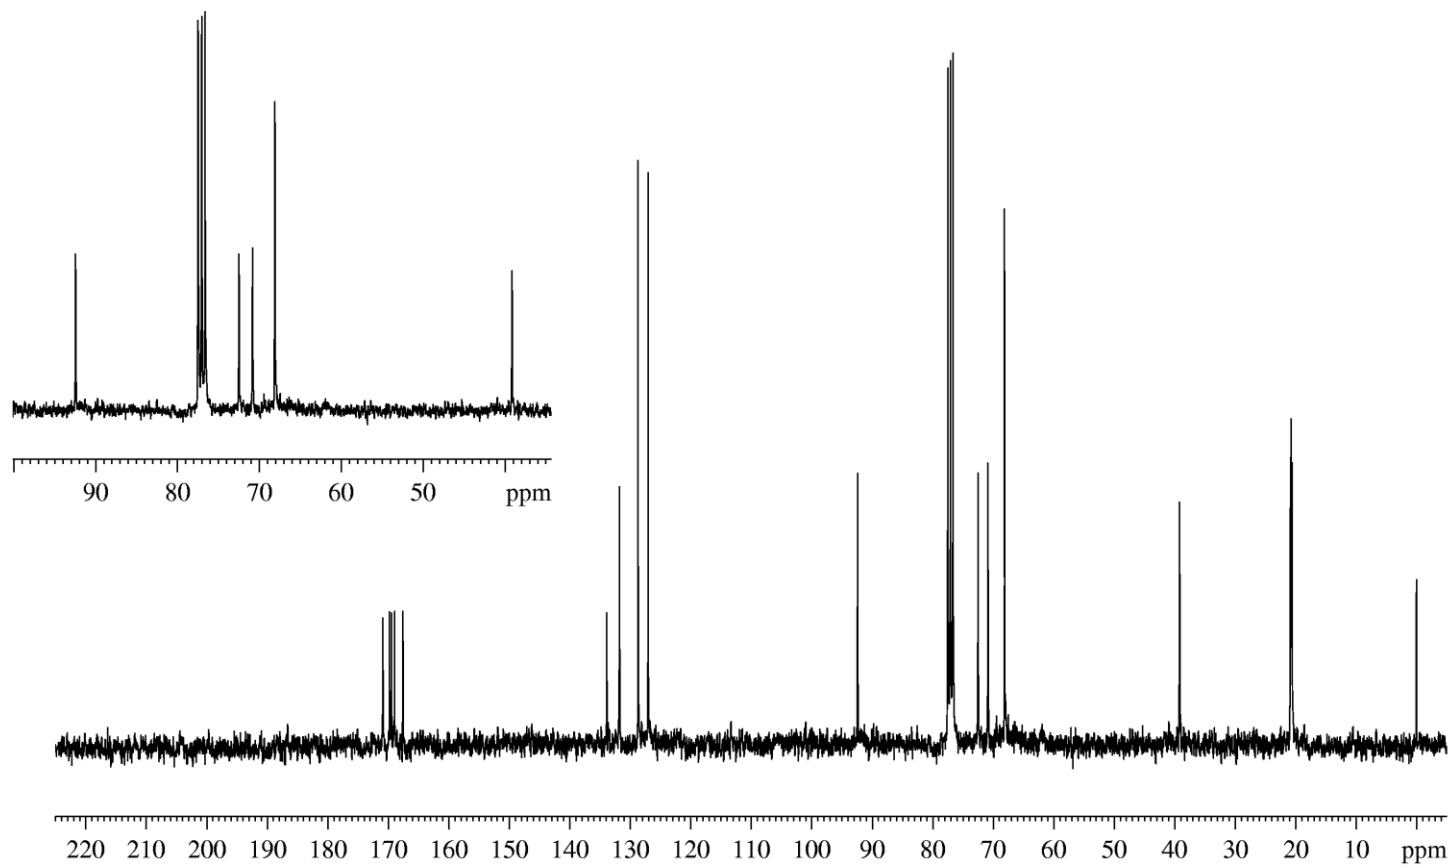

**Figure S8.**  $^{13}\text{C}$  NMR spectrum of **5βp** in  $\text{CDCl}_3$ .

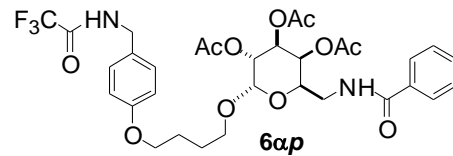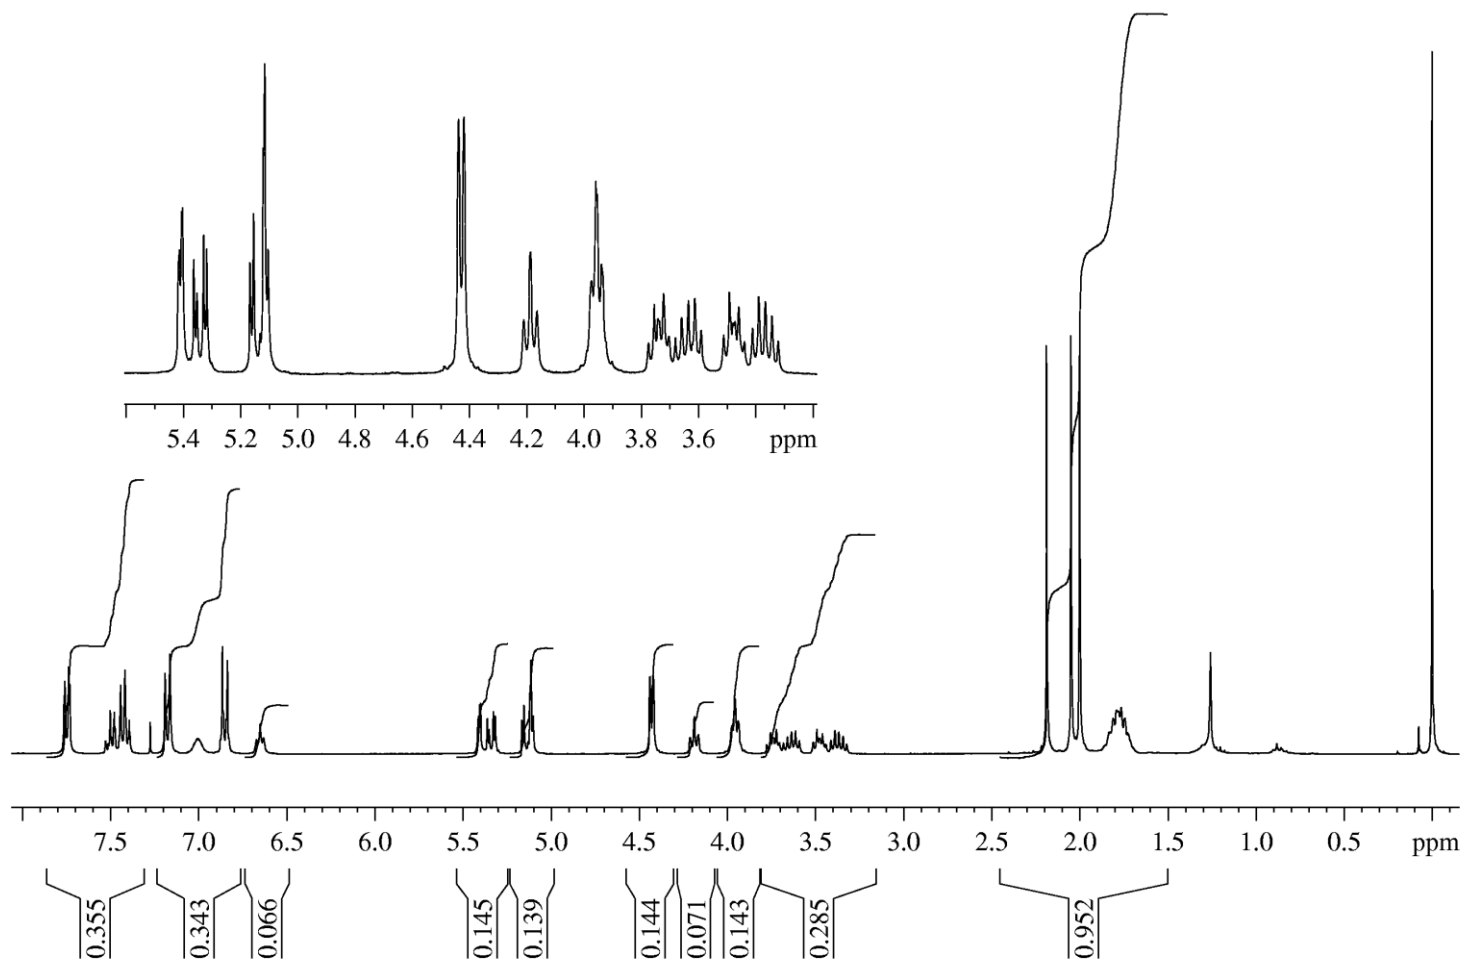

**Figure S9.**  $^1\text{H}$  NMR spectrum of **6ap** in  $\text{CDCl}_3$ .

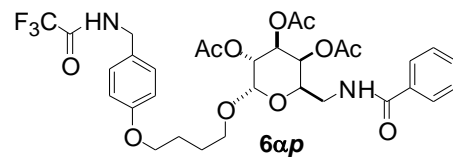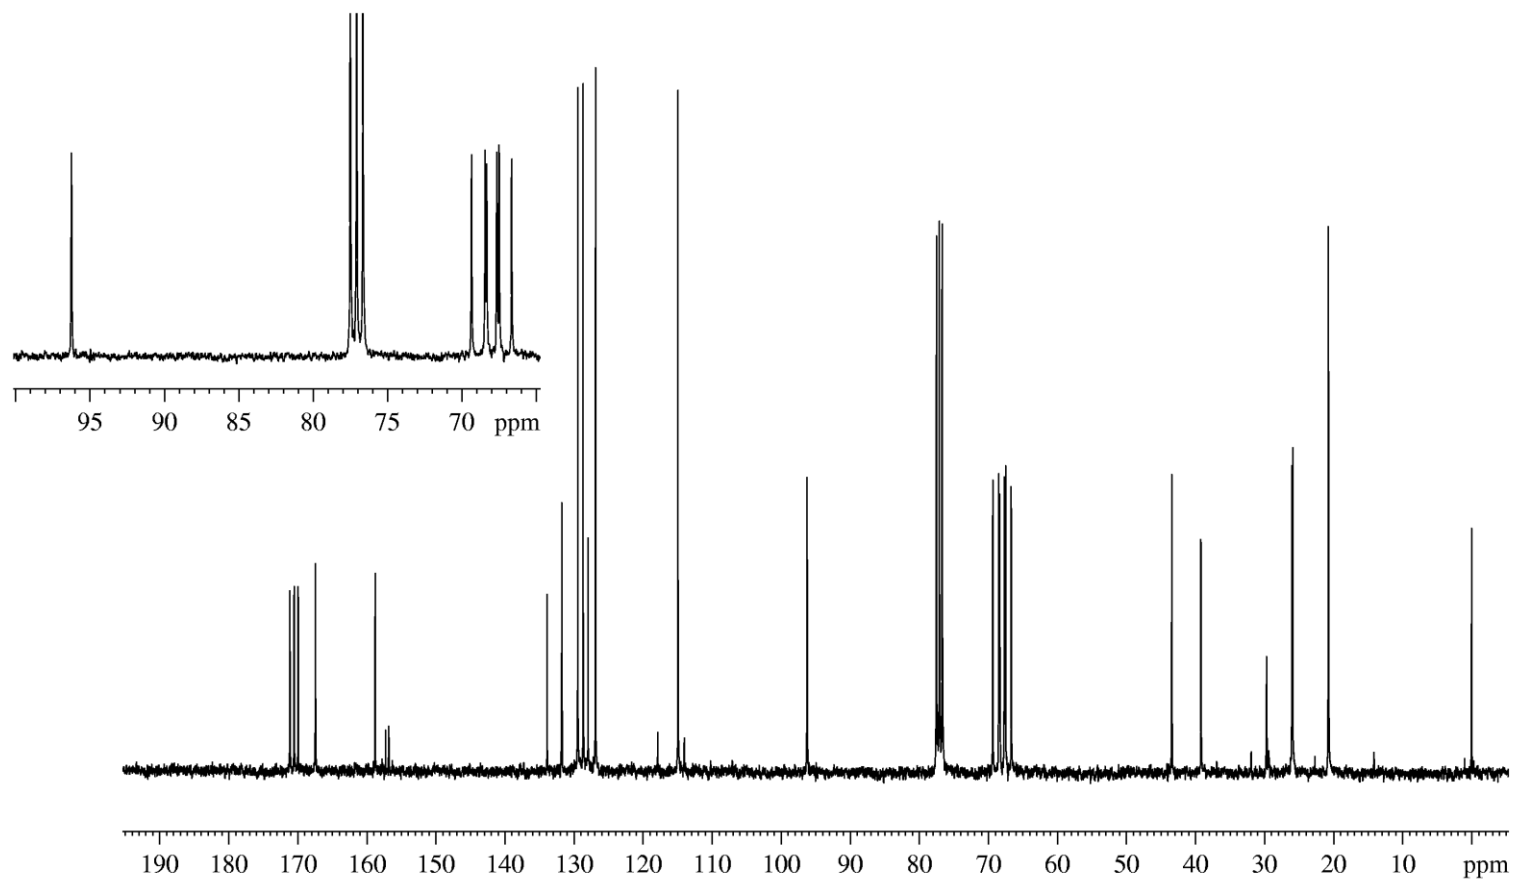

**Figure S10.**  $^{13}\text{C}$  NMR spectrum of **6 $\alpha$ p** in  $\text{CDCl}_3$ .

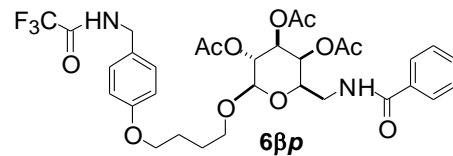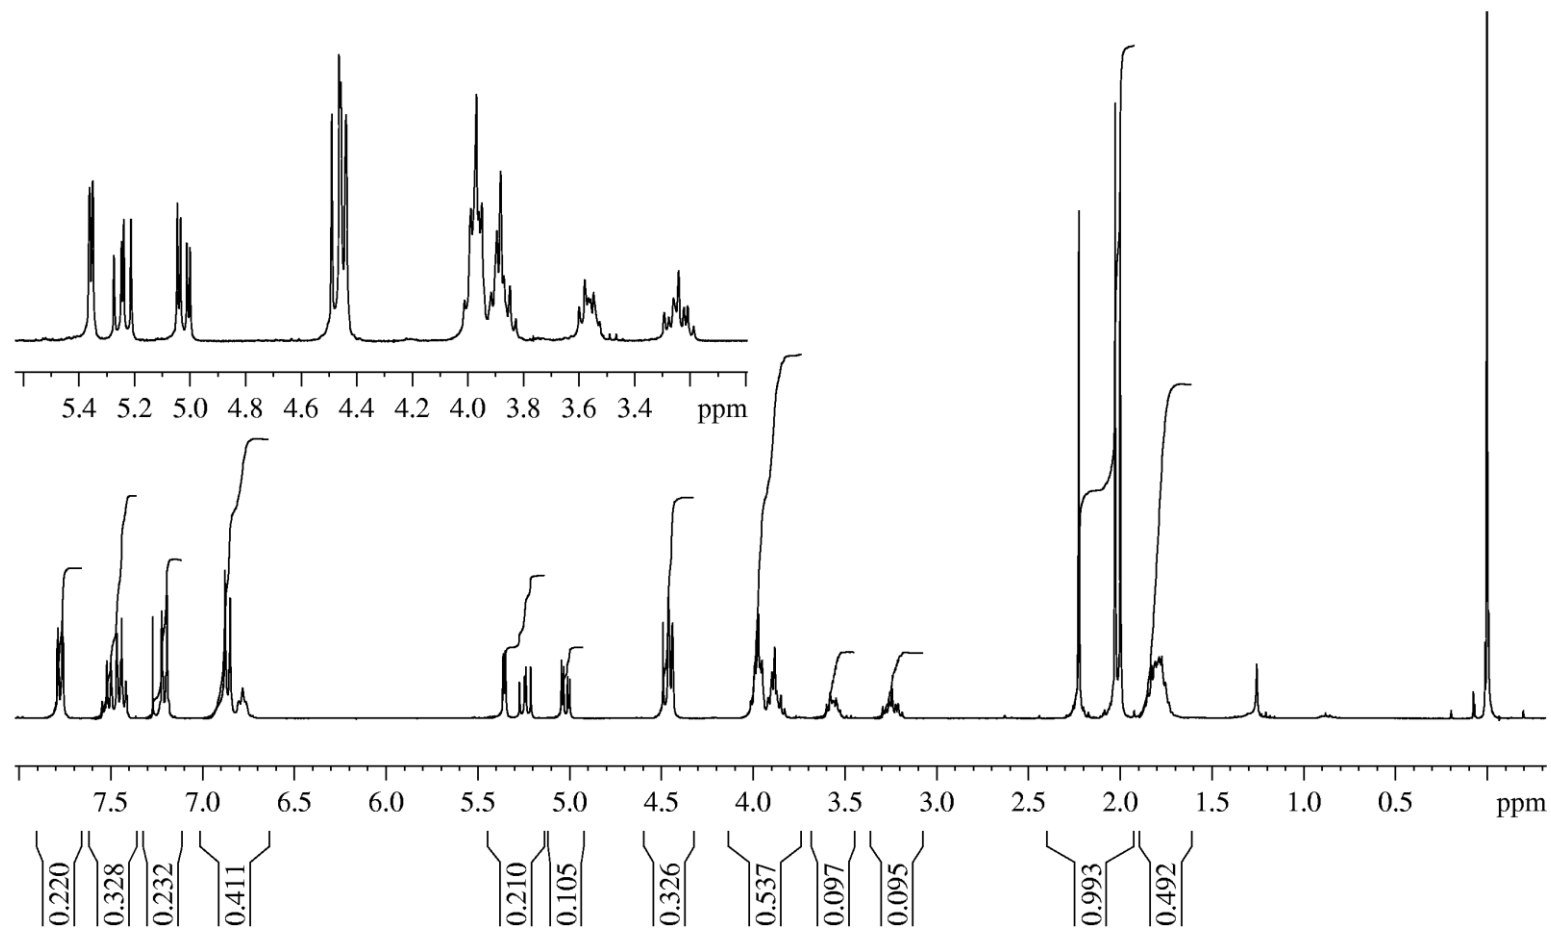

**Figure S11.** <sup>1</sup>H NMR spectrum of **6βp** in CDCl<sub>3</sub>.



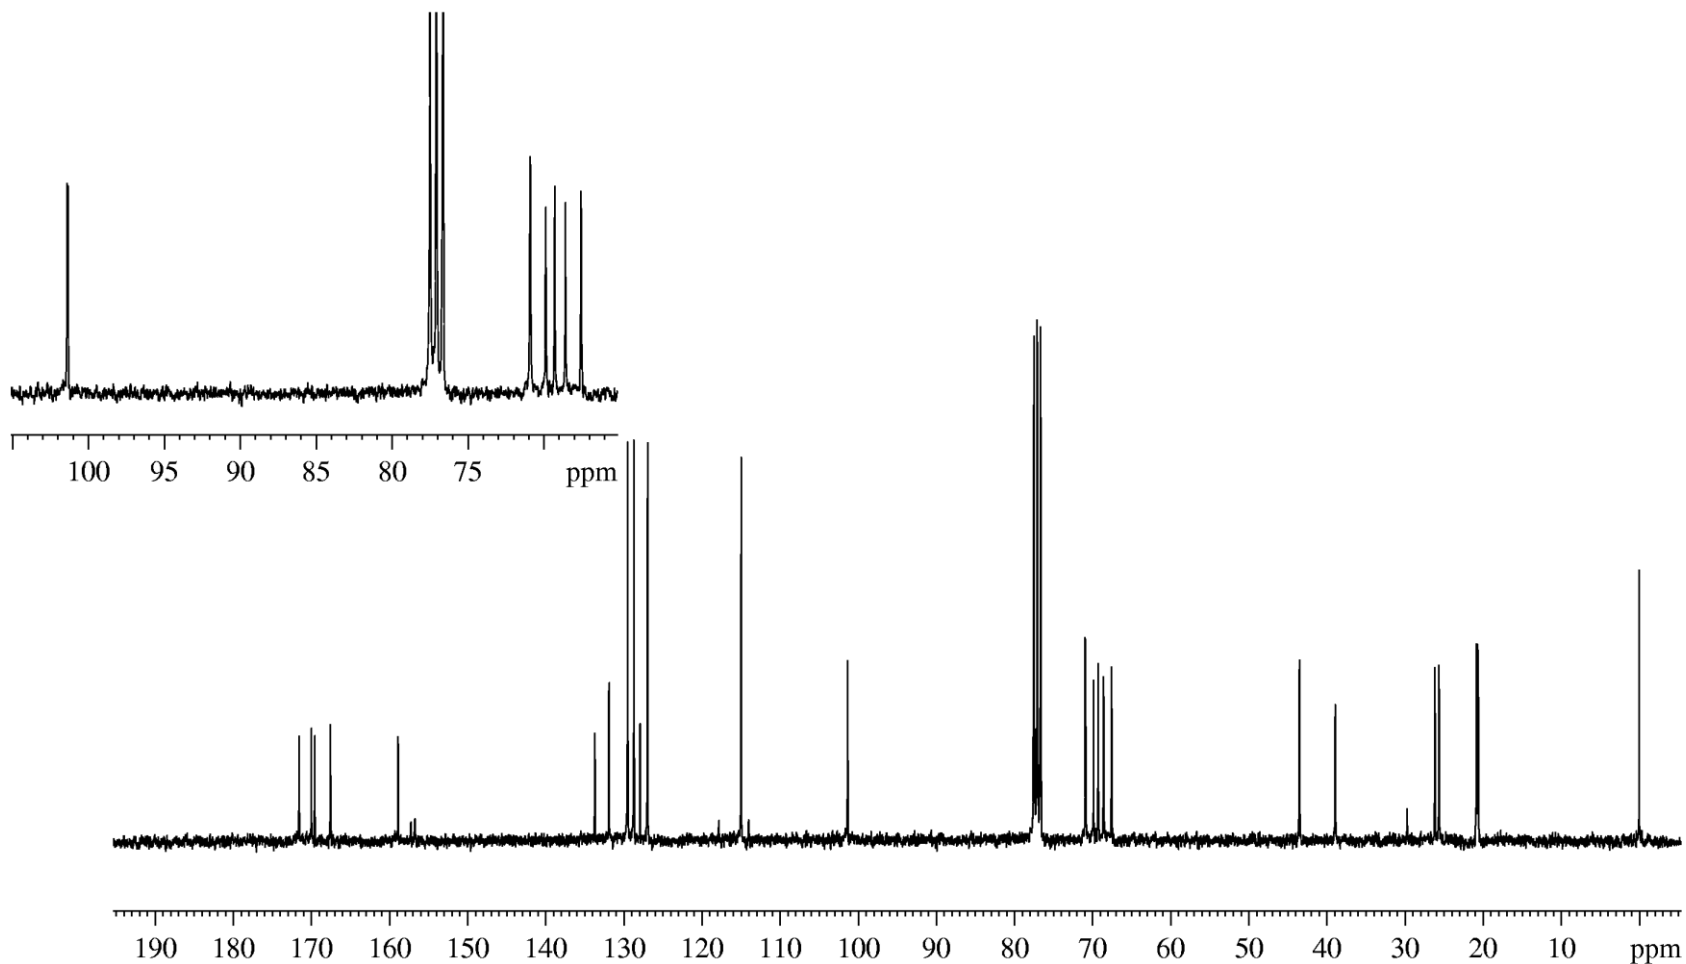

**Figure S12.**  $^{13}\text{C}$  NMR spectrum of **6βp** in  $\text{CDCl}_3$ .

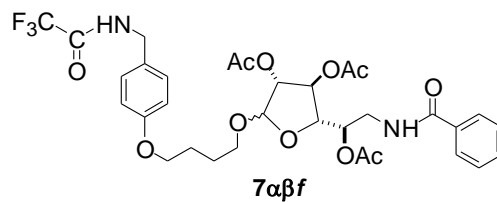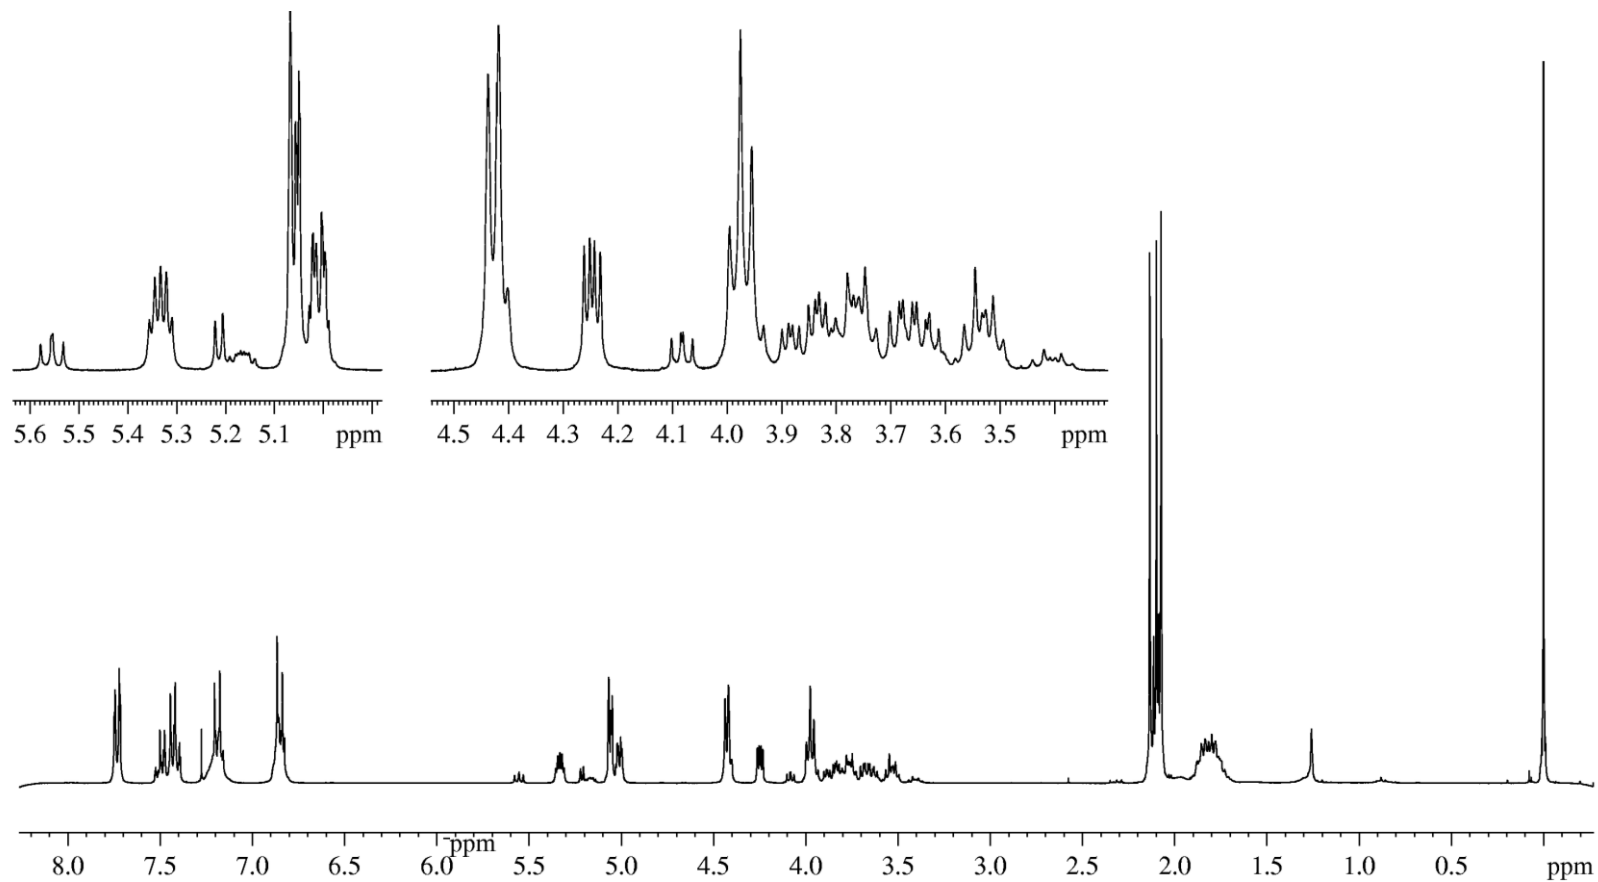

**Figure S13.**  $^1\text{H}$  NMR spectrum of **7 $\alpha$ f** in  $\text{CDCl}_3$ .

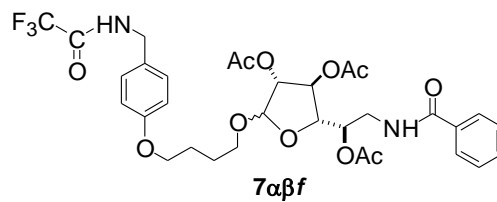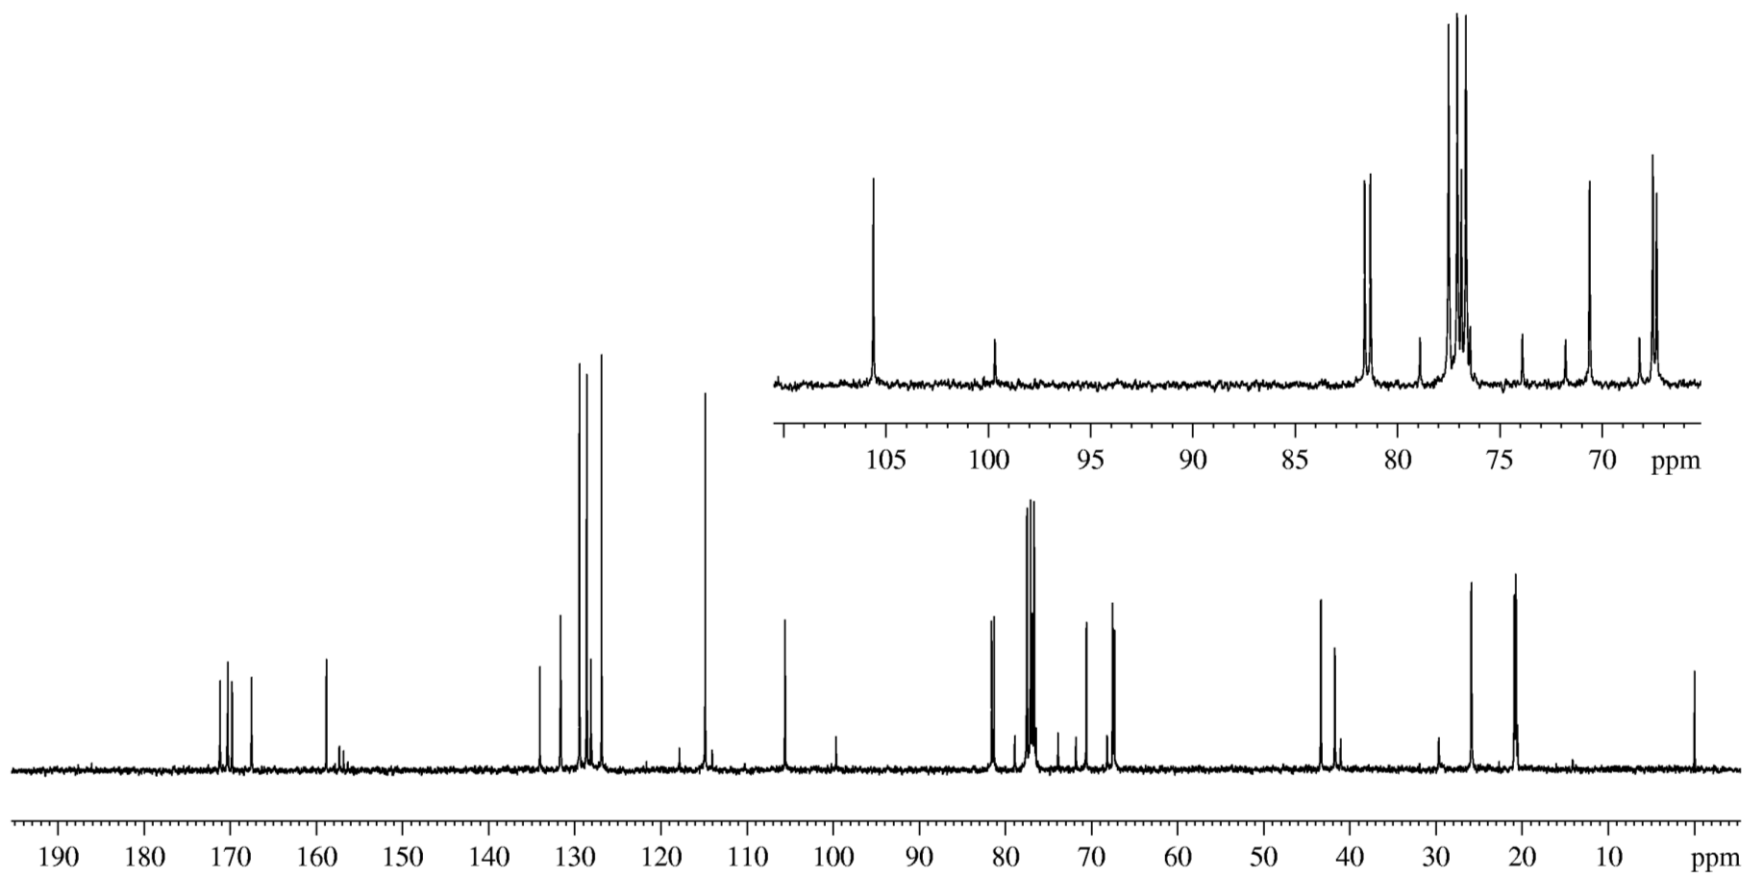

**Figure S14.**  $^{13}\text{C}$  NMR spectrum of **7 $\alpha\beta$ f** in  $\text{CDCl}_3$ .

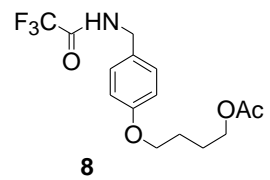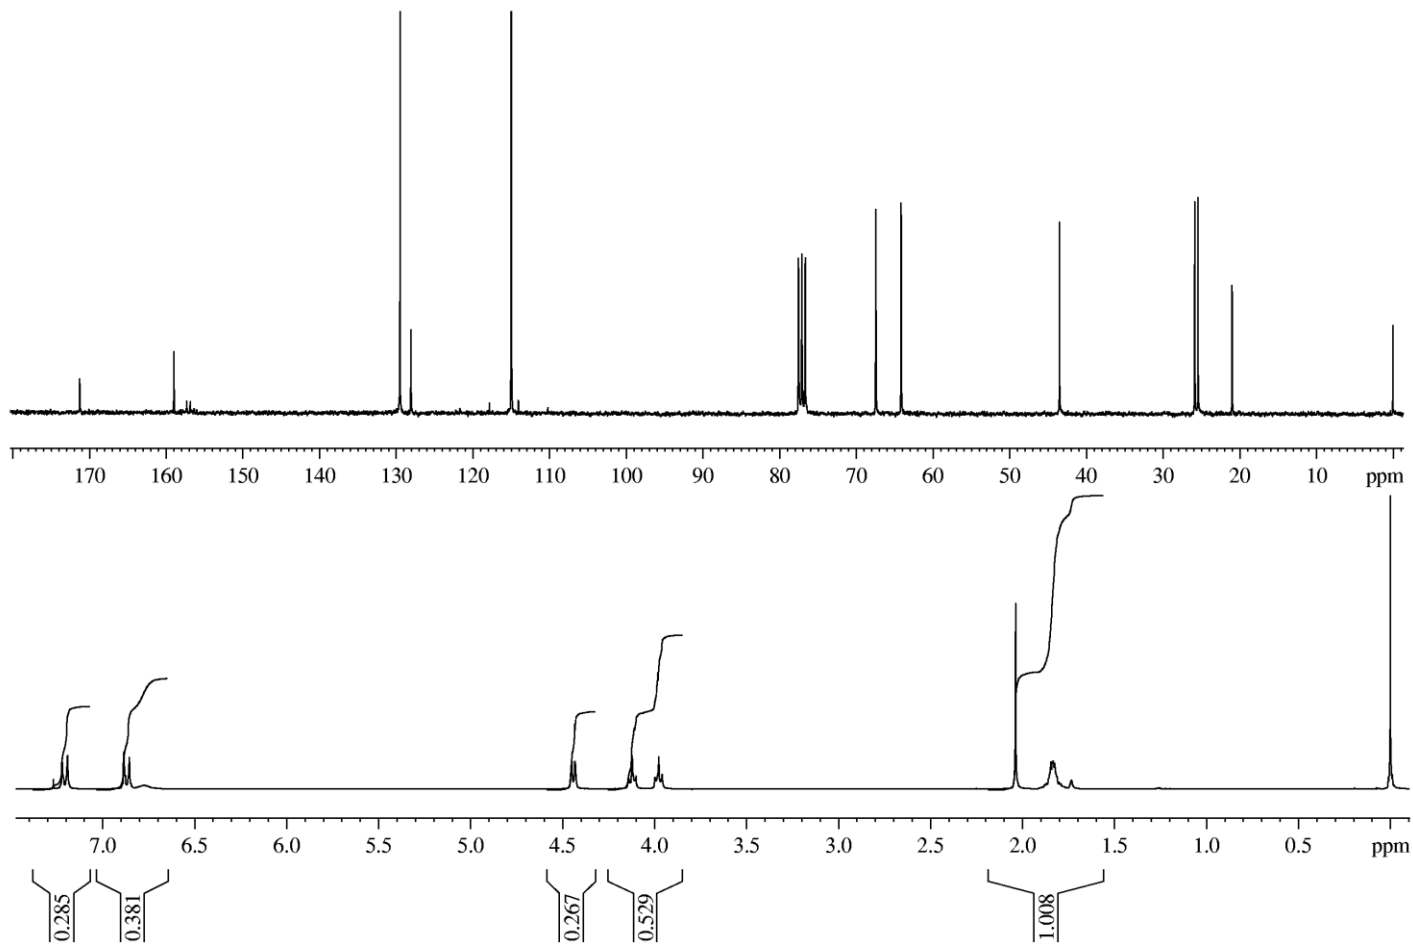

**Figure S15.**  $^1\text{H}$  and  $^{13}\text{C}$  NMR spectra of **8** in  $\text{CDCl}_3$ .

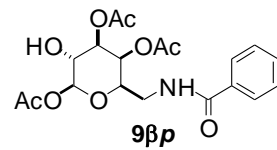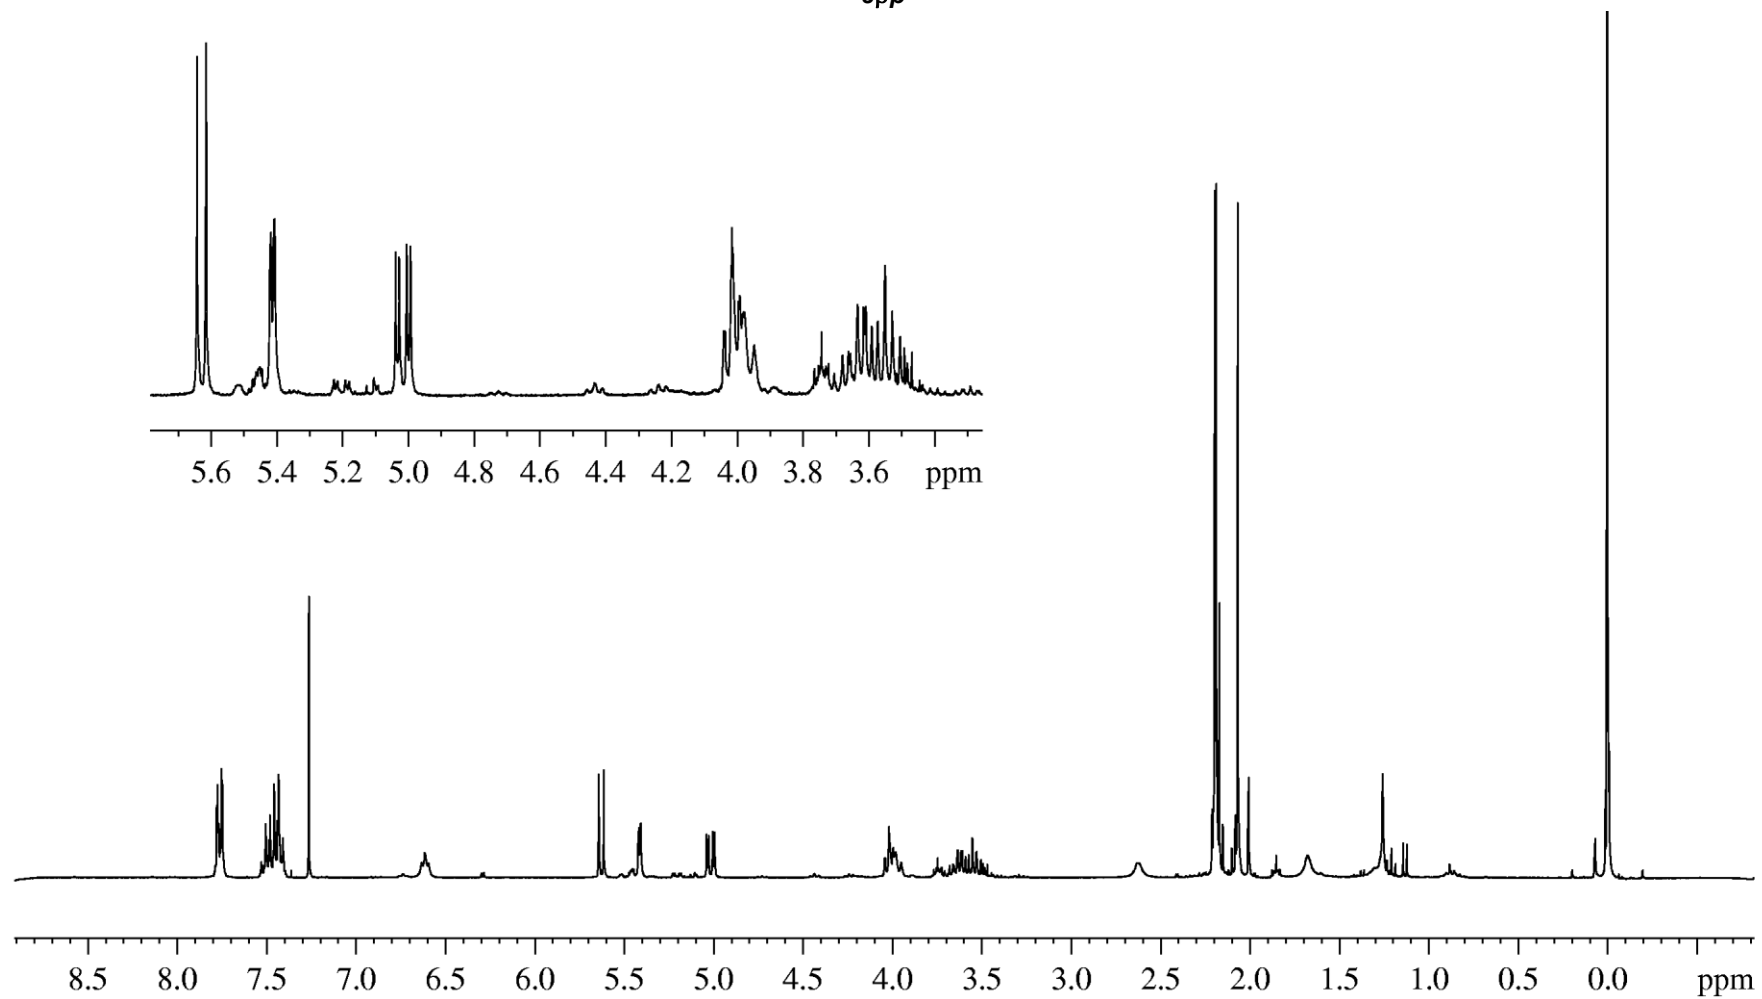

**Figure S16.**  $^1\text{H}$  NMR spectrum of **9βp** in  $\text{CDCl}_3$ .



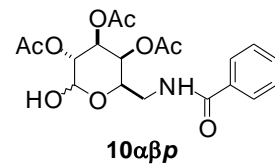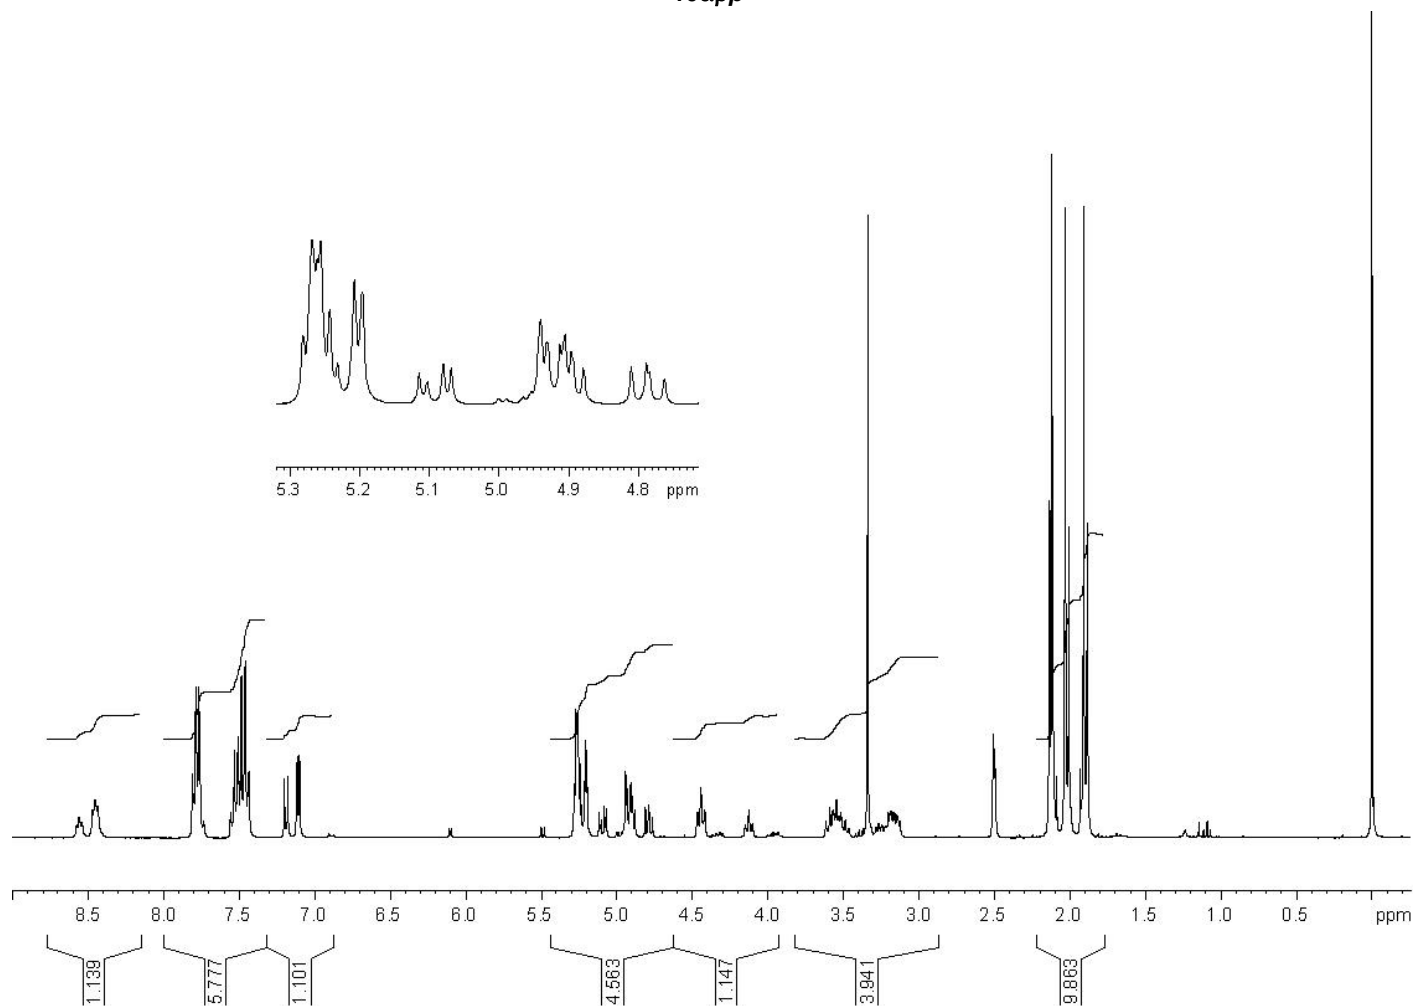

**Figure S18.**  $^1\text{H}$  NMR spectrum of **10 $\alpha\beta$ p** in  $\text{DMSO-}d_6$ .

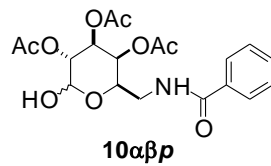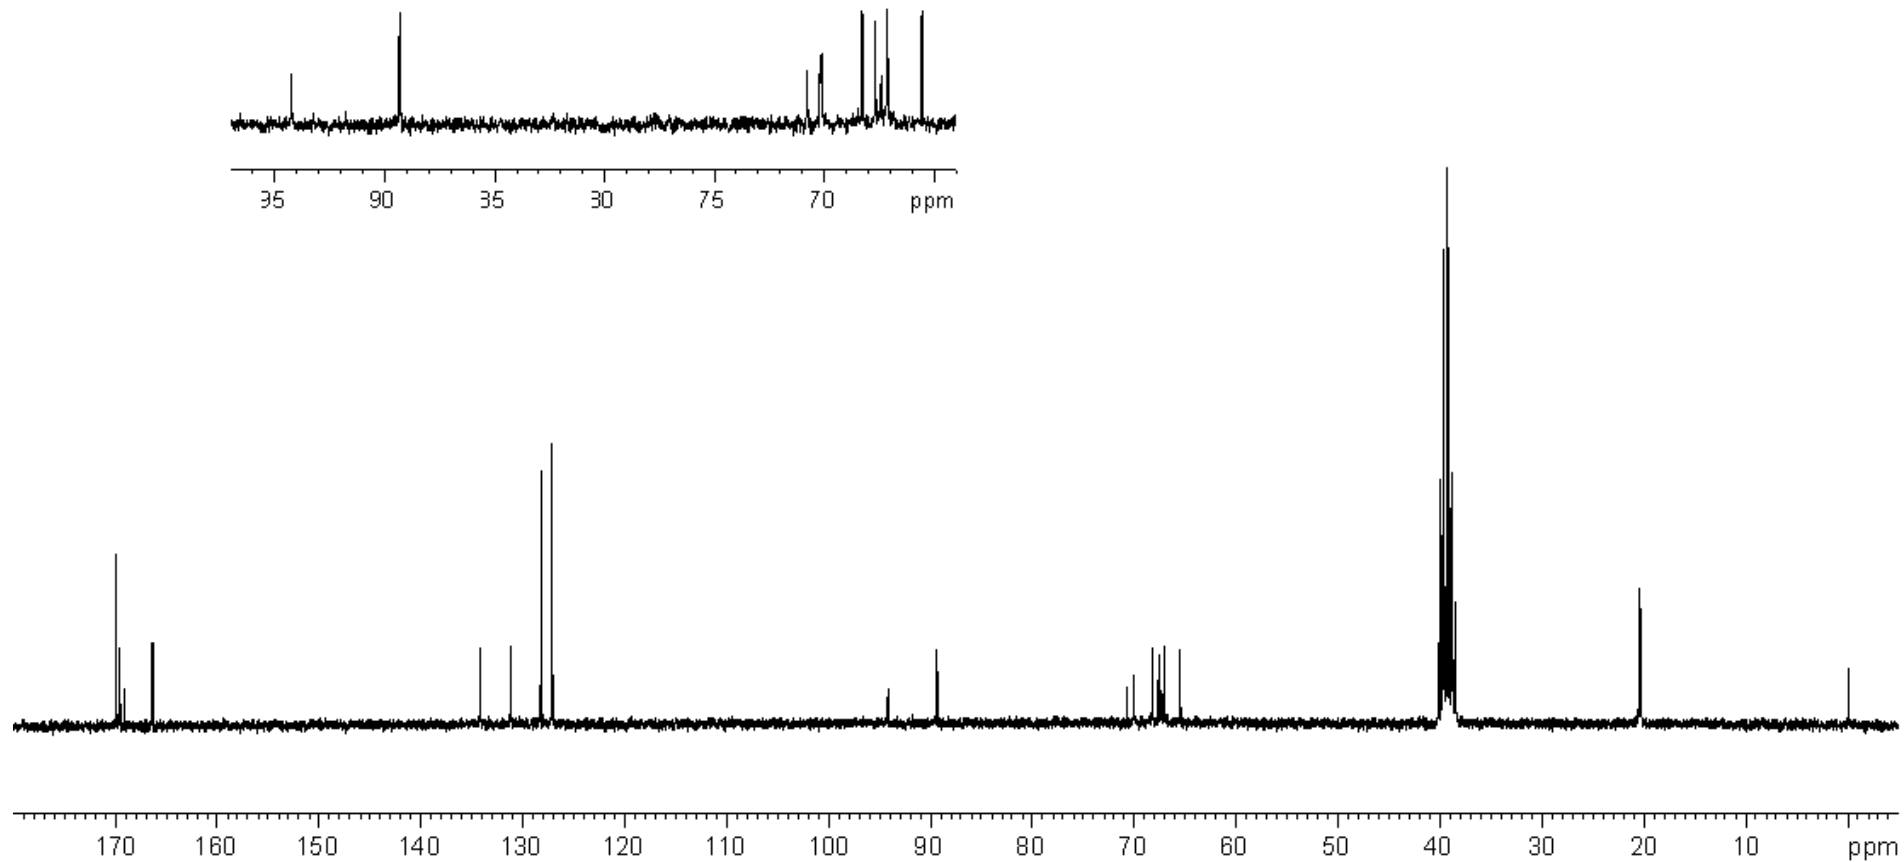

**Figure S19.**  $^{13}\text{C}$  NMR spectrum of **10 $\alpha\beta$ p** in  $\text{DMSO-}d_6$ .



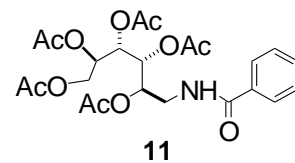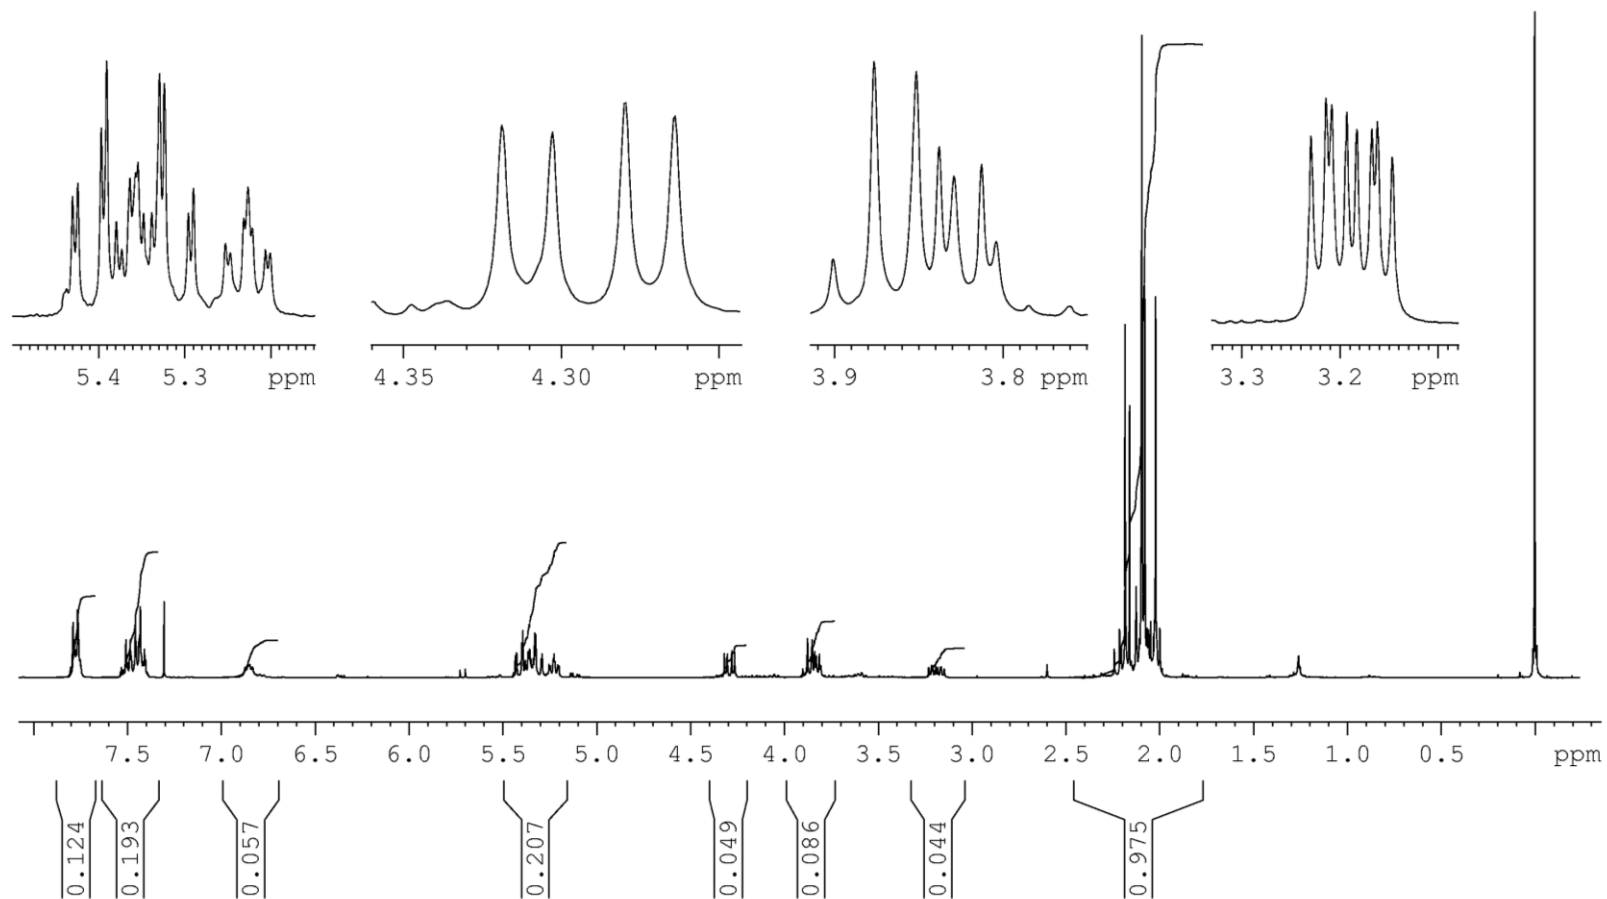

**Figure S20.**  $^1\text{H}$  NMR spectrum of **11** in  $\text{CDCl}_3$ .

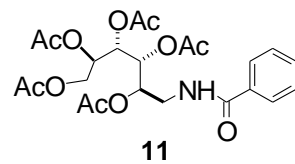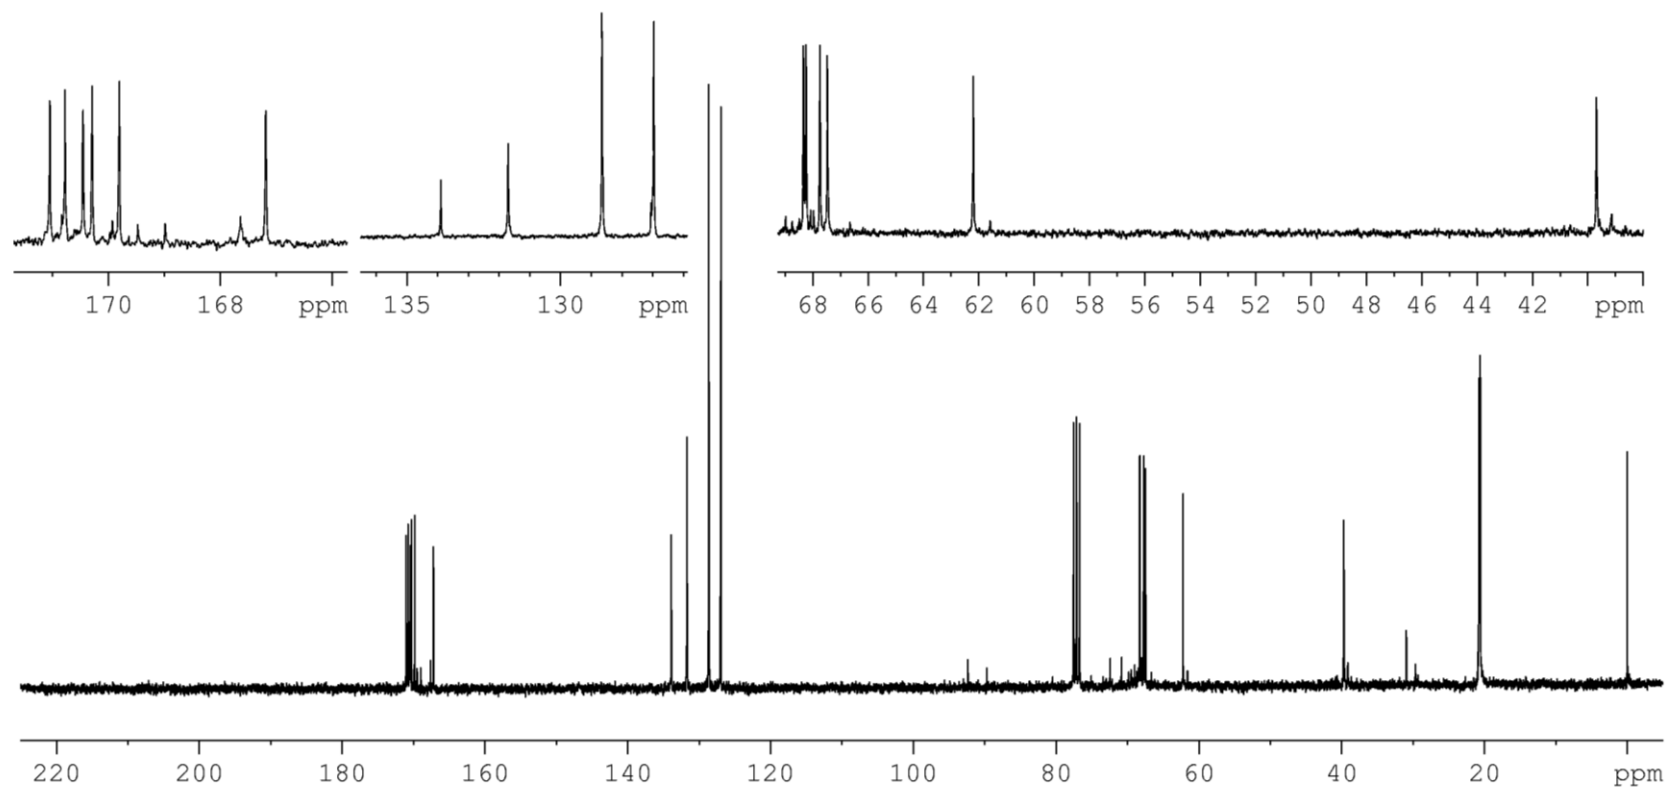

**Figure S21.**  $^{13}\text{C}$  NMR spectrum of **11** in  $\text{CDCl}_3$ .

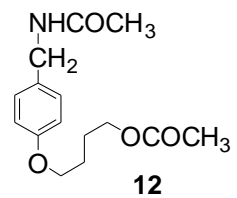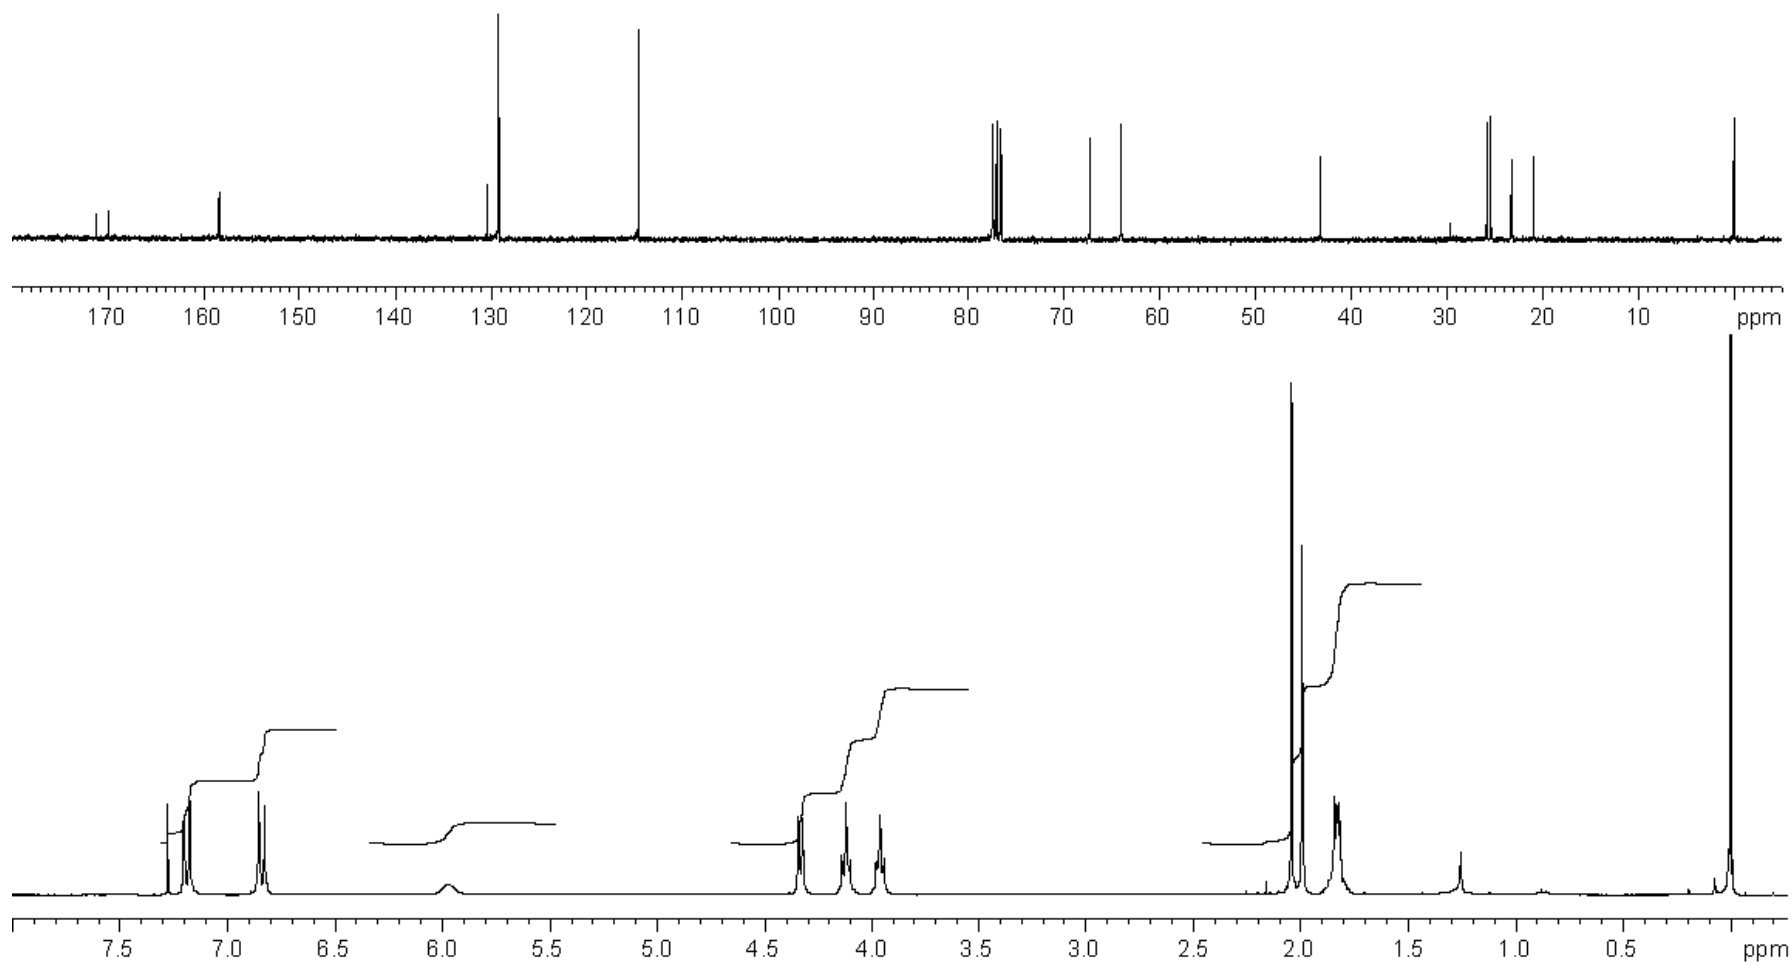

**Figure S22.**  $^1\text{H}$  and  $^{13}\text{C}$  NMR spectra of **12** in  $\text{CDCl}_3$ .
